# Supplementary material
Source: PubMed Central journal article supplement (PMC4908811)
Supplement: NIHMS738792-supplement-Supplement.pdf [file NIHMS738792-supplement-Supplement.pdf]

Supplementary Information \_ Characteristics of dosimeters used for photon dose estimation

Supplementary Table S1 was completed by health physicists using the best available information; however, expert judgment was also necessary.

| Country: Facility (period)                      | Dosimeter Type                  | Dosimeter material | Commercial type        | Filters          | Density thickness (mg.cm <sup>-2</sup> ) | Thickness (mm) | Ref     |
|-------------------------------------------------|---------------------------------|--------------------|------------------------|------------------|------------------------------------------|----------------|---------|
| France: CEA-civil (1950-1956)                   | Film-open window                | Dental film        | Open                   | Open window      |                                          |                |         |
| France: CEA-civil (1957-1966)                   | Multi Sn 300mg.cm <sup>-2</sup> | Film               | Kodak type 1           | Open window      |                                          |                |         |
|                                                 |                                 |                    |                        | Sn               | 291                                      | 0.4            |         |
|                                                 |                                 |                    |                        | Cd               | 311                                      | 0.36           |         |
| France: CEA-civil (1967-2004)                   | PS1: Multi Cu-Pb                | Film               | Kodak type 1           | Open window      |                                          |                | (32-38) |
|                                                 |                                 |                    |                        | plastic          | 300                                      |                |         |
|                                                 |                                 |                    |                        | Al               | 400                                      | 1.5            |         |
|                                                 |                                 |                    |                        | Cu+Al            | 528                                      | 0.2+1.3        |         |
|                                                 |                                 |                    |                        | Cu               | 530                                      | 0.6            |         |
|                                                 |                                 |                    |                        | Cd+Sn+Pb         | 295+345+452                              | 0.34+0.6+0.4   |         |
|                                                 |                                 |                    |                        | Sn+ Pb           | 575+452                                  | 1+0.4          |         |
| France: CEA-civil (1985-2004)                   | Li plastic filter               | Li based TLD       | PGP1                   | Open window      |                                          |                | (33)    |
|                                                 |                                 |                    |                        | Plastic          | 300                                      |                |         |
| France: CEA-civil (1994-2004)                   | Li plastic filter               | Li based TLD       | Harshaw                | Open window      |                                          |                | (33)    |
|                                                 |                                 |                    |                        | Plastic          | 300 or 1000                              |                |         |
| France: COGEMA-Marcoule Pierrelatte (1955-1964) | Multi Sn 300mg.cm <sup>-2</sup> | Film               | Kodak type 1           | Open window      |                                          |                |         |
|                                                 |                                 |                    |                        | Sn               | 291                                      | 0.4            |         |
|                                                 |                                 |                    |                        | Cd               | 311                                      | 0.36           |         |
| France: COGEMA-Marcoule-Pierrelatte (1965-1987) | Multi Cu-Pb                     | Film               | Kodak type 2 DM6       | Open window      |                                          |                |         |
|                                                 |                                 |                    |                        | Polypropylen     | 245                                      | 3              |         |
|                                                 |                                 |                    |                        | Cd               | 531.5                                    | 0.4            |         |
|                                                 |                                 |                    |                        | Sn               | 535.5                                    | 0.4            |         |
|                                                 |                                 |                    |                        | Sn + Pb          | 1715                                     | 0.4+1          |         |
|                                                 |                                 |                    |                        | Al               | 451                                      | 1              |         |
| France: COGEMA-Marcoule-Pierrelatte (1988-2003) | Multi Cu-Pb +TLD                | Film + TLD         | Cogebadge <sup>a</sup> | Open window      |                                          |                | (39)    |
|                                                 |                                 |                    |                        | Polypropylen     | 282                                      | 3              |         |
|                                                 |                                 |                    |                        | Cu 1st filter    | 427                                      | 0.3            |         |
|                                                 |                                 |                    |                        | Cu 2nd filter    | 1091                                     | 1              |         |
|                                                 |                                 |                    |                        | Sn + Pb          | 1591                                     | 0.4+1          |         |
|                                                 |                                 |                    |                        | Al               | 453                                      | 1              |         |
| France: COGEMA-Marcoule-Pierrelatte (2003-2004) | TLD part only                   | Li based TLD       | Cogebadge (TLD only)   | Plastic ABS      |                                          | 1              | (39)    |
|                                                 |                                 |                    |                        | mylar            | 7                                        |                |         |
|                                                 |                                 |                    |                        | Plastic ABS + Cd |                                          | 3+0.8          |         |
|                                                 |                                 |                    |                        | Al + Cd          |                                          | 1+0.8          |         |
| France: COGEMA-La Hague (1965-1968)             | Multi Sn 300mg.cm <sup>-2</sup> | Film               | Dupont DeNemours       | Open window      |                                          |                |         |
|                                                 |                                 |                    |                        | Sn               | 282                                      |                |         |
|                                                 |                                 |                    |                        | Cd               | 299                                      |                |         |
|                                                 | >100mg.cm <sup>-2</sup>         |                    |                        | Pb               | 1020                                     | 0.9            |         |

<sup>a</sup> Designed by COGEMA

Supplementary Information \_ Characteristics of dosimeters used for photon dose estimation

Supplementary Table S1 was completed by health physicists using the best available information; however, expert judgment was also necessary.

| Country: Facility (period)                        | Dosimeter Type                  | Dosimeter material | Commercial type                      | Filters       | Density thickness (mg.cm <sup>-2</sup> ) | Thickness (mm) | Ref  |
|---------------------------------------------------|---------------------------------|--------------------|--------------------------------------|---------------|------------------------------------------|----------------|------|
| France: COGEMA-La Hague (1968-1970)               | Multi Cu-Pb                     | Film               | Dupont DeNemours DM6                 | Open window   |                                          |                |      |
|                                                   |                                 |                    |                                      | Polypropylen  | 245                                      | 3              |      |
|                                                   |                                 |                    |                                      | Cd            | 531.5                                    | 0.4            |      |
|                                                   |                                 |                    |                                      | Sn            | 535.5                                    | 0.4            |      |
|                                                   |                                 |                    |                                      | Sn + Pb       | 1715                                     | 0.4+1          |      |
|                                                   |                                 |                    |                                      | Al            | 451                                      | 1              |      |
| France: COGEMA-La Hague (1971-1986)               |                                 | Film               | Kodak type 3 DM6                     | As above      |                                          |                |      |
| France: COGEMA-La Hague (1987-2004 <sup>b</sup> ) | Multi Cu-Pb +TLD                | Film +TLD          | Cogebadge-Kodak type3                | Open window   |                                          |                |      |
|                                                   |                                 |                    |                                      | Polypropylen  | 282                                      | 3              |      |
|                                                   |                                 |                    |                                      | Cu 1st filter | 427                                      | 0.3            |      |
|                                                   |                                 |                    |                                      | Cu 2nd filter | 1091                                     | 1              |      |
|                                                   |                                 |                    |                                      | Sn + Pb       | 1591                                     | 0.4+1          |      |
|                                                   |                                 |                    |                                      | Al            | 453                                      | 1              |      |
| France: EDF (1968-1982)                           | Multi Sn 300mg.cm <sup>-2</sup> | Film               | Film DMA-CEA                         | Sn            | 291                                      | 0.4            | (40) |
|                                                   |                                 |                    |                                      | PVC           |                                          | 2.1            |      |
| France: EDF (1982-1999)                           | Multi Sn/Pb                     | Film               | Kodak type 2                         | PVC           |                                          | 1              |      |
|                                                   |                                 |                    |                                      | Pb            |                                          | 0.5 to 1       |      |
| France: EDF (1999-2003)                           | Multi Cu-Pb                     | Film               | LCIE LANDAUER Type 7<br>Kodak type 2 | Open window   | 75                                       |                | (41) |
|                                                   |                                 |                    |                                      | Cu            | 250                                      | 0.2            |      |
|                                                   |                                 |                    |                                      | Cu            | 610                                      | 0.6            |      |
|                                                   |                                 |                    |                                      | Pb+Cu         | 800                                      | 0.5+0.2        |      |

| Country: Facility (period)                                       | Dosimeter Type                                      | Dosimeter material | Commercial type                           | Filters           | Density thickness (mg.cm <sup>-2</sup> ) | Thickness (mm) | Ref     |
|------------------------------------------------------------------|-----------------------------------------------------|--------------------|-------------------------------------------|-------------------|------------------------------------------|----------------|---------|
| UK: BNFL-Capenhurst (?-?); BNFL-Springfields (?-?); Others (?-?) | Missing info                                        | ?                  | ?                                         | ?                 |                                          |                |         |
| UK: AEA-Dounreay (1956-1963)                                     | Tinplate:<br>Multi Sn/Pb<br>>100mg.cm <sup>-2</sup> | Film               | AERE-Tinplate<br><br>Ilford PM1+ Kodak RM | Open window       |                                          |                | (42)    |
|                                                                  |                                                     |                    |                                           | Fe + Sn           | 250 + 730                                | 0.38 +1        |         |
|                                                                  |                                                     |                    |                                           | Fe + Cd           | 250 + 864                                | 0.38 +1        |         |
| UK: AEA-Dounreay (1964-1990)                                     | AERE/RPS:<br>Multi British Sn-Pb                    | Film               | Kodak<br><br>+                            | Open window       |                                          |                | (43-50) |
|                                                                  |                                                     |                    |                                           | Plastic           | 50+300                                   | 0.5+3          |         |
|                                                                  |                                                     |                    |                                           | Dural             | 280                                      | 1              |         |
|                                                                  |                                                     |                    |                                           | Sn + Pb           | 520 + 350                                | 0.71 + 0.3     |         |
|                                                                  |                                                     |                    |                                           | Cd + Pb           | 610 + 350                                | 0.71 + 0.3     |         |
|                                                                  |                                                     |                    |                                           | Pb edge shielding | 350                                      | 0.3            |         |
|                                                                  |                                                     |                    |                                           | Indium (4g)       |                                          |                |         |
| UK: AEA-Harwell (1946-1950)                                      | One elem. Pb                                        | Dental Film        |                                           | Open, Pb          | ~1150                                    | 1              |         |
| UK: AEA-Harwell (1951-1961)                                      | Missing info                                        | Film               | Ilford PM1+Kodak RM                       | Open window       |                                          |                |         |
|                                                                  |                                                     |                    |                                           | Sn or Cd          | 730 (864)                                | 1              |         |
| UK: AEA-Harwell (1962-1990)                                      | AERE/RPS:<br>Multi British Sn-Pb                    | Film               | Kodak                                     | Open window       |                                          |                | (43-50) |
|                                                                  |                                                     |                    |                                           | Plastic           | 50+300                                   | 0.5+3          |         |

<sup>b</sup> Since 2006, cogebadge used with TLD only

Supplementary Information \_ Characteristics of dosimeters used for photon dose estimation

Supplementary Table S1 was completed by health physicists using the best available information; however, expert judgment was also necessary.

| Country: Facility (period)      | Dosimeter Type                                       | Dosimeter material | Commercial type             | Filters           | Density thickness (mg.cm <sup>-2</sup> ) | Thickness (mm) | Ref     |
|---------------------------------|------------------------------------------------------|--------------------|-----------------------------|-------------------|------------------------------------------|----------------|---------|
|                                 |                                                      |                    |                             | Dural             | 280                                      | 1              |         |
|                                 |                                                      |                    |                             | Sn + Pb           | 520 + 350                                | 0.71 + 0.3     |         |
|                                 |                                                      |                    |                             | Cd + Pb           | 610 + 350                                | 0.71 + 0.3     |         |
|                                 |                                                      |                    |                             | Pb edge shielding | 350                                      | 0.3            |         |
|                                 |                                                      |                    |                             | Indium (4g)       |                                          |                |         |
| UK: AEA-Winfrith (1959-1961)    | Tinplate :<br>Multi Sn/Pb<br>>100mg.cm <sup>-2</sup> | Film               | AERE-Tinplate               | Open window       |                                          |                | (42)    |
|                                 |                                                      |                    | Ilford PM1+ Kodak RM        | Fe + Sn           | 250 + 730                                | 0.38 +1        |         |
|                                 |                                                      |                    |                             | Fe + Cd           | 250 + 864                                | 0.38 +1        |         |
| UK: AEA-Winfrith (1962-1970)    | AERE/RPS:<br>Multi British Sn-Pb                     | Film               | Kodak                       | Open window       |                                          |                | (43-50) |
|                                 |                                                      |                    |                             | Plastic           | 50+300                                   | 0.5+3          |         |
|                                 |                                                      |                    |                             | Dural             | 280                                      | 1              |         |
|                                 |                                                      |                    |                             | Sn + Pb           | 520 + 350                                | 0.71 + 0.3     |         |
|                                 |                                                      |                    |                             | Cd + Pb           | 610 + 350                                | 0.71 + 0.3     |         |
|                                 |                                                      |                    |                             | Pb edge shielding | 350                                      | 0.3            |         |
|                                 |                                                      |                    |                             | Indium (4g)       |                                          |                |         |
| UK: AEA-Winfrith (1970-1990)    | Li other filters                                     | Li based TLD       |                             | Open, Cd          | 864                                      | 1              |         |
| UK: AEA/BNFL-Risley (62-63)     | Multi British Sn-Pb                                  | Film               | Kodak RM 1                  | Open window       |                                          |                |         |
|                                 |                                                      |                    |                             | Sn                | 730                                      | 1              |         |
|                                 |                                                      |                    |                             | Pb                | ~1150                                    | 1              |         |
| UK: AEA/BNFL-Risley (1964-1981) | AERE/RPS:<br>Multi British Sn-Pb                     | Film               | Kodak RM1                   | Open window       |                                          |                | (43-50) |
|                                 |                                                      |                    |                             | Plastic           | 50+300                                   | 0.5+3          |         |
|                                 |                                                      |                    |                             | Dural             | 280                                      | 1              |         |
|                                 |                                                      |                    |                             | Sn + Pb           | 520 + 350                                | 0.71 + 0.3     |         |
|                                 |                                                      |                    |                             | Cd + Pb           | 610 + 350                                | 0.71 + 0.3     |         |
|                                 |                                                      |                    |                             | Pb edge shielding | 350                                      | 0.3            |         |
|                                 |                                                      |                    |                             | Indium (4g)       |                                          |                |         |
|                                 |                                                      |                    |                             | Ta                | 166                                      | 0.1            |         |
| UK: AEA/BNFL-Risley (1982-1990) |                                                      | Film               | Eastman Kodak type 2        | AERE/RPS + Ta     | 166                                      | 0.1            |         |
| UK: Amersham (1940-1947)        | One elem. Pb                                         | Dental Film        |                             | Pb                | ~1150                                    | 1              |         |
| UK: Amersham (1948-1955)        | One elem. Pb                                         | Film               | Ilford Industrial A in clip | Pb                | ~1150                                    | 1              |         |
| UK: Amersham (1956-1963)        | Tinplate :<br>Multi Sn/Pb<br>>100mg.cm <sup>-2</sup> | Film               | AERE-Tinplate<br>Ilford PM1 | Open window       |                                          |                | (42)    |
|                                 |                                                      |                    |                             | Fe + Sn           | 250 + 730                                | 0.38 +1        |         |
|                                 |                                                      |                    |                             | Fe + Cd           | 250 + 864                                | 0.38 +1        |         |
| UK: Amersham (1963-1982)        | AERE/RPS:<br>Multi British Sn-Pb                     | Film               | Kodak RM                    | Open window       |                                          |                | (43-50) |
|                                 |                                                      |                    |                             | Plastic           | 50+300                                   | 0.5+3          |         |
|                                 |                                                      |                    |                             | Dural             | 280                                      | 1              |         |
|                                 |                                                      |                    |                             | Sn + Pb           | 520 + 350                                | 0.71 + 0.3     |         |
|                                 |                                                      |                    |                             | Pb edge shielding | 350                                      | 0.3            |         |
|                                 |                                                      |                    |                             | Indium (4g)       |                                          |                |         |
| UK: Amersham (1982-1997)        |                                                      | Film               | Kodak type 2                | As above          |                                          |                |         |
| UK: AWE (1947-1949)             | One elem. Pb                                         | Dental Film        |                             | Open, Pb          | ~1150                                    | 1              |         |
| UK: AWE (1950-1955)             | Tinplate :<br>Multi Sn/Pb<br>>100mg.cm <sup>-2</sup> | Film               | AERE-Tinplate<br>Ilford PM1 | Open window       |                                          |                | (42)    |
|                                 |                                                      |                    |                             | Fe + Sn           | 250 + 730                                | 0.38 +1        |         |
|                                 |                                                      |                    |                             | Fe + Cd           | 250 + 864                                | 0.38 +1        |         |

Supplementary Information \_ Characteristics of dosimeters used for photon dose estimation

Supplementary Table S1 was completed by health physicists using the best available information; however, expert judgment was also necessary.

| Country: Facility (period)       | Dosimeter Type                                              | Dosimeter material                                                       | Commercial type                  | Filters           | Density thickness (mg.cm <sup>-2</sup> ) | Thickness (mm)  | Ref     |
|----------------------------------|-------------------------------------------------------------|--------------------------------------------------------------------------|----------------------------------|-------------------|------------------------------------------|-----------------|---------|
| UK: AWE (1956-1961)              |                                                             | Film                                                                     | Ilford PM1+ Kodak RM             | AERE-Tinplate     |                                          |                 |         |
| UK: AWE (1962-1988)              | <b>AERE/RPS:<br/>Multi British Sn-Pb</b>                    | Film                                                                     | Kodak                            | Open window       |                                          |                 | (43-50) |
|                                  |                                                             |                                                                          |                                  | <b>Plastic</b>    | <b>50+300</b>                            | <b>0.5+3</b>    |         |
|                                  |                                                             |                                                                          |                                  | Dural             | 280                                      | 1               |         |
|                                  |                                                             |                                                                          |                                  | Sn + Pb           | 520 + 350                                | 0.71 + 0.3      |         |
|                                  |                                                             |                                                                          |                                  | Cd + Pb           | 610 + 350                                | 0.71 + 0.3      |         |
|                                  |                                                             |                                                                          | +                                | Pb edge shielding | 350                                      | 0.3             |         |
|                                  |                                                             |                                                                          |                                  | Indium (4g)       |                                          |                 |         |
| UK: AWE (1988-1994)              | Ca and mixed                                                | LiF TLD/ PTFE disc +CaSO <sub>4</sub> TLD/TFE disc (30:70% wt for both ) | Vinten Type 31                   |                   |                                          |                 | (51)    |
| UK: BNFL-Chapelcross (1958-1959) | Multi British Sn-Pb                                         | Film                                                                     | Ilford PM 1&3                    | Open, Sn/Pb       |                                          | 1               |         |
| UK: BNFL-Chapelcross (1960-1964) | <b>Tinplate :</b><br>Multi Sn/Pb<br>>100mg.cm <sup>-2</sup> | Film                                                                     | <b>AERE-Tinplate</b><br>Kodak RM | Open window       |                                          |                 | (42)    |
|                                  |                                                             |                                                                          |                                  | Fe + Sn           | 250 + 730                                | 0.38 +1         |         |
|                                  |                                                             |                                                                          |                                  | Fe + Cd           | 250 + 864                                | 0.38 +1         |         |
| UK: BNFL-Chapelcross (1965-1969) | Multi Sn 600mg.cm <sup>-2</sup>                             | Film                                                                     | Kodak RM                         | Open window       |                                          |                 |         |
|                                  |                                                             |                                                                          |                                  | Sn                | 730                                      | 1               |         |
|                                  |                                                             |                                                                          |                                  | Cd                | 864                                      | 1               |         |
|                                  |                                                             |                                                                          |                                  | Dural             | 300                                      |                 |         |
| UK: BNFL-Chapelcross (1970-1980) | <b>AERE/RPS:<br/>Multi British Sn-Pb</b>                    | Film                                                                     | Black spot (Kodak RM)            | Open window       |                                          |                 | (43-50) |
|                                  |                                                             |                                                                          |                                  | <b>Plastic</b>    | <b>50+300</b>                            | <b>0.5+3</b>    |         |
|                                  |                                                             |                                                                          |                                  | Dural             | 280                                      | 1               |         |
|                                  |                                                             |                                                                          |                                  | Sn + Pb           | 520 + 350                                | 0.71 + 0.3      |         |
|                                  |                                                             |                                                                          |                                  | Cd + Pb           | 610 + 350                                | 0.71 + 0.3      |         |
|                                  |                                                             |                                                                          | +                                | Pb edge shielding | 350                                      | 0.3             |         |
|                                  |                                                             |                                                                          |                                  | Indium (4g)       |                                          |                 |         |
| UK: BNFL-Chapelcross (1981-1997) |                                                             | Film                                                                     | Black spot Kodak type 2          | As above          |                                          |                 |         |
| UK: BNFL-Sellafield (1950-1950)  | One elem. Sn/Cd/Ag                                          | Dental film                                                              | Ilford                           | Open, Cd          | 864                                      | 1               |         |
| UK: BNFL-Sellafield (1951-1952)  | One elem. Pb                                                | Film                                                                     | Ilford industrial A              | Open, Pb          | ~1150                                    | 1               |         |
| UK: BNFL-Sellafield (1953-1959)  | Multi Sn/Pb<br>>100mg.cm <sup>-2</sup>                      | Film                                                                     | Ilford PM1                       | Open window       |                                          |                 |         |
|                                  |                                                             |                                                                          |                                  | Fe + Pb +Al       | 250+635+124                              | 0.38+0.56+ 0.46 |         |
| UK: BNFL-Sellafield (1960-1963)  | Multi British Sn-Pb                                         | Film                                                                     | Kodak RM 1                       | Open window       |                                          |                 |         |
|                                  |                                                             |                                                                          |                                  | Sn                | 730                                      | 1               |         |
|                                  |                                                             |                                                                          |                                  | Pb                | ~1150                                    | 1               |         |
| UK: BNFL-Sellafield (1964-1981)  | <b>AERE/RPS:<br/>Multi British Sn-Pb</b>                    | Film                                                                     | Kodak RM1                        | Open window       |                                          |                 | (43-50) |
|                                  |                                                             |                                                                          |                                  | <b>Plastic</b>    | <b>50+300</b>                            | <b>0.5+3</b>    |         |
|                                  |                                                             |                                                                          |                                  | Dural             | 280                                      | 1               |         |
|                                  |                                                             |                                                                          |                                  | Sn + Pb           | 520 + 350                                | 0.71 + 0.3      |         |
|                                  |                                                             |                                                                          |                                  | Cd + Pb           | 610 + 350                                | 0.71 + 0.3      |         |
|                                  |                                                             |                                                                          | +                                | Pb edge shielding | 350                                      | 0.3             |         |
|                                  |                                                             |                                                                          |                                  | Indium (4g)       |                                          |                 |         |
|                                  |                                                             |                                                                          |                                  | Ta                | 166                                      | 0.1             |         |

Supplementary Information \_ Characteristics of dosimeters used for photon dose estimation

Supplementary Table S1 was completed by health physicists using the best available information; however, expert judgment was also necessary.

| Country: Facility (period)                   | Dosimeter Type                                       | Dosimeter material | Commercial type             | Filters           | Density thickness (mg.cm <sup>-2</sup> ) | Thickness (mm) | Ref     |
|----------------------------------------------|------------------------------------------------------|--------------------|-----------------------------|-------------------|------------------------------------------|----------------|---------|
| UK: BNFL-Sellafield (1982-1990)              |                                                      | Film               | Eastman Kodak type 2        | AERE/RPS + Ta     | 166                                      | 0.1            |         |
| UK CCLRC-Daresbury (1966-1981 and 1987-1997) | AERE/RPS:<br>Multi British Sn-Pb                     | Film               | Kodak                       | Open window       |                                          |                | (43-50) |
|                                              |                                                      |                    |                             | Plastic           | 50+300                                   | 0.5+3          |         |
|                                              |                                                      |                    |                             | Dural             | 280                                      | 1              |         |
|                                              |                                                      |                    |                             | Sn + Pb           | 520 + 350                                | 0.71 + 0.3     |         |
|                                              |                                                      |                    |                             | Cd + Pb           | 610 + 350                                | 0.71 + 0.3     |         |
|                                              |                                                      |                    |                             | Pb edge shielding | 350                                      | 0.3            |         |
|                                              |                                                      |                    |                             | Indium (4g)       |                                          |                |         |
| UK: CCLRC-Daresbury (1981-1986)              | Li plastic filter                                    | LiF TLD in PTFE    | NRPB                        | LiF               |                                          | 0.4            | (52-54) |
|                                              |                                                      |                    |                             | Plastic           | 700                                      |                |         |
| UK: CCLRC-Daresbury (1986-1987)              | Unknown filters                                      | LiF TLD in PTFE    |                             | Multiple filters  | ?                                        | ?              |         |
| UK: CCLRC-RAL (1960-1961)                    | Missing info                                         | Film               | Ilford PM1+Kodak RM         | Open window       |                                          |                |         |
|                                              |                                                      |                    |                             | Sn or Cd          | 730 (864)                                | 1              |         |
| UK: CCLRC-RAL (1962-1990)                    | AERE/RPS:<br>Multi British Sn-Pb                     | Film               | Kodak                       | Open window       |                                          |                | (43-50) |
|                                              |                                                      |                    |                             | Plastic           | 50+300                                   | 0.5+3          |         |
|                                              |                                                      |                    |                             | Dural             | 280                                      | 1              |         |
|                                              |                                                      |                    |                             | Sn + Pb           | 520 + 350                                | 0.71 + 0.3     |         |
|                                              |                                                      |                    |                             | Cd + Pb           | 610 + 350                                | 0.71 + 0.3     |         |
|                                              |                                                      |                    |                             | Pb edge shielding | 350                                      | 0.3            |         |
|                                              |                                                      |                    |                             | Indium (4g)       |                                          |                |         |
| UK: DRPS (196319-83)                         | AERE/RPS:<br>Multi British Sn-Pb                     | Film               | Kodak RM                    | Open window       |                                          |                | (43-50) |
|                                              |                                                      |                    |                             | Plastic           | 50+300                                   | 0.5+3          |         |
|                                              |                                                      |                    |                             | Dural             | 280                                      | 1              |         |
|                                              |                                                      |                    |                             | Sn + Pb           | 520 + 350                                | 0.71 + 0.3     |         |
|                                              |                                                      |                    |                             | Cd + Pb           | 610 + 350                                | 0.71 + 0.3     |         |
|                                              |                                                      |                    |                             | Pb edge shielding | 350                                      | 0.3            |         |
|                                              |                                                      |                    |                             | Indium (4g)       |                                          |                |         |
| UK: DRPS (1983-1997)                         | Li plastic filter                                    | Li based TLD       | Panasonic 803               | Plastic           | 1011                                     |                |         |
| UK: Magnox-Berkeley centre (1961-1963)       | Tinplate :<br>Multi Sn/Pb<br>>100mg.cm <sup>-2</sup> | Film               | AERE-Tinplate<br>Ilford PM1 | Open window       |                                          |                | (42)    |
|                                              |                                                      |                    |                             | Fe + Sn           | 250 + 730                                | 0.38 +1        |         |
|                                              |                                                      |                    |                             | Fe + Cd           | 250 + 864                                | 0.38 +1        |         |
| UK: Magnox-Berkeley centre (1964-1965)       | AERE/RPS:<br>Multi British Sn-Pb                     | Film               | Nos 1&2 (Kodak RM)          | Open window       |                                          |                | (43-50) |
|                                              |                                                      |                    |                             | Plastic           | 50+300                                   | 0.5+3          |         |
|                                              |                                                      |                    |                             | Dural             | 280                                      | 1              |         |
|                                              |                                                      |                    |                             | Sn + Pb           | 520 + 350                                | 0.71 + 0.3     |         |
|                                              |                                                      |                    |                             | Cd + Pb           | 610 + 350                                | 0.71 + 0.3     |         |
|                                              |                                                      |                    |                             | Pb edge shielding | 350                                      | 0.3            |         |
|                                              |                                                      |                    |                             | Indium (4g)       |                                          |                |         |
| UK: Magnox-Berkeley centre (1965-1997)       | AERE/RPS:<br>Multi British Sn-Pb                     | Film               | Kodak type 2                | Open window       |                                          |                | (43-50) |
|                                              |                                                      |                    |                             | Plastic           | 50+300                                   | 0.5+3          |         |
|                                              |                                                      |                    |                             | Dural             | 280                                      | 1              |         |
|                                              |                                                      |                    |                             | Sn + Pb           | 520 + 350                                | 0.71 + 0.3     |         |
|                                              |                                                      |                    |                             | Cd + Pb           | 610 + 350                                | 0.71 + 0.3     |         |
|                                              |                                                      |                    |                             | Pb edge shielding | 350                                      | 0.3            |         |
|                                              |                                                      |                    |                             | Indium (4g)       |                                          |                |         |

Supplementary Information \_ Characteristics of dosimeters used for photon dose estimation

Supplementary Table S1 was completed by health physicists using the best available information; however, expert judgment was also necessary.

| Country: Facility (period)         | Dosimeter Type                                       | Dosimeter material | Commercial type                          | Filters           | Density thickness (mg.cm <sup>-2</sup> ) | Thickness (mm) | Ref     |
|------------------------------------|------------------------------------------------------|--------------------|------------------------------------------|-------------------|------------------------------------------|----------------|---------|
| UK: Magnox-Berkeley PS (1961-1965) | Tinplate :<br>Multi Sn/Pb<br>>100mg.cm <sup>-2</sup> | Film               | AERE-Tinplate<br>Ilford PM1              | Open window       |                                          |                | (42)    |
|                                    |                                                      |                    |                                          | Fe + Sn           | 250 + 730                                | 0.38 +1        |         |
|                                    |                                                      |                    |                                          | Fe + Cd           | 250 + 864                                | 0.38 +1        |         |
| UK: Magnox-Berkeley PS (1966-1980) | AERE/RPS:<br>Multi British Sn-Pb                     | Film               | Kodak RM<br><br>+                        | Open window       |                                          |                | (43-50) |
|                                    |                                                      |                    |                                          | Plastic           | 50+300                                   | 0.5+3          |         |
|                                    |                                                      |                    |                                          | Dural             | 280                                      | 1              |         |
|                                    |                                                      |                    |                                          | Sn + Pb           | 520 + 350                                | 0.71 + 0.3     |         |
|                                    |                                                      |                    |                                          | Cd + Pb           | 610 + 350                                | 0.71 + 0.3     |         |
|                                    |                                                      |                    |                                          | Pb edge shielding | 350                                      | 0.3            |         |
|                                    |                                                      |                    |                                          | Indium (4g)       |                                          |                |         |
| UK: Magnox-Berkeley PS (1981-1997) | AERE/RPS:<br>Multi British Sn-Pb                     | Film               | Kodak type 2<br><br>+                    | Open window       |                                          |                | (43-50) |
|                                    |                                                      |                    |                                          | Plastic           | 50+300                                   | 0.5+3          |         |
|                                    |                                                      |                    |                                          | Dural             | 280                                      | 1              |         |
|                                    |                                                      |                    |                                          | Sn + Pb           | 520 + 350                                | 0.71 + 0.3     |         |
|                                    |                                                      |                    |                                          | Cd + Pb           | 610 + 350                                | 0.71 + 0.3     |         |
|                                    |                                                      |                    |                                          | Pb edge shielding | 350                                      | 0.3            |         |
|                                    |                                                      |                    |                                          | Indium (4g)       |                                          |                |         |
| UK: Magnox-Bradwell (1961-1963)    | RPS/Sutton:<br>Multi British Sn-Pb                   | Film               | RPS Sutton<br>nylon holder<br>Ilford PM1 | Open window       |                                          |                | (55)    |
|                                    |                                                      |                    |                                          | Nylon             | 207                                      | 1.8            |         |
|                                    |                                                      |                    |                                          | Sn + nylon        | 730 + 92                                 | 1 + 0.8        |         |
|                                    |                                                      |                    |                                          | Dural + nylon     | 252 + 104                                | 0.9 + 0.9      |         |
| UK: Magnox-Bradwell (1963-1981)    | AERE/RPS:<br>Multi British Sn-Pb                     | Film               | Kodak RM<br><br>+                        | Open window       |                                          |                | (43-50) |
|                                    |                                                      |                    |                                          | Plastic           | 50+300                                   | 0.5+3          |         |
|                                    |                                                      |                    |                                          | Dural             | 280                                      | 1              |         |
|                                    |                                                      |                    |                                          | Sn + Pb           | 520 + 350                                | 0.71 + 0.3     |         |
|                                    |                                                      |                    |                                          | Cd + Pb           | 610 + 350                                | 0.71 + 0.3     |         |
|                                    |                                                      |                    |                                          | Pb edge shielding | 350                                      | 0.3            |         |
|                                    |                                                      |                    |                                          | Indium (4g)       |                                          |                |         |
| UK: Magnox-Bradwell (1982-1997)    | AERE/RPS:<br>Multi British Sn-Pb                     | Film               | Kodak type 2<br><br>+                    | Open window       |                                          |                | (43-50) |
|                                    |                                                      |                    |                                          | Plastic           | 50+300                                   | 0.5+3          |         |
|                                    |                                                      |                    |                                          | Dural             | 280                                      | 1              |         |
|                                    |                                                      |                    |                                          | Sn + Pb           | 520 + 350                                | 0.71 + 0.3     |         |
|                                    |                                                      |                    |                                          | Cd + Pb           | 610 + 350                                | 0.71 + 0.3     |         |
|                                    |                                                      |                    |                                          | Pb edge shielding | 350                                      | 0.3            |         |
|                                    |                                                      |                    |                                          | Indium (4g)       |                                          |                |         |
| UK: Magnox-Dungeness (1964-1965)   | AERE/RPS:<br>Multi British Sn-Pb                     | Film               | No 2 (Kodak RM)<br><br>+                 | Open window       |                                          |                | (43-50) |
|                                    |                                                      |                    |                                          | Plastic           | 50+300                                   | 0.5+3          |         |
|                                    |                                                      |                    |                                          | Dural             | 280                                      | 1              |         |
|                                    |                                                      |                    |                                          | Sn + Pb           | 520 + 350                                | 0.71 + 0.3     |         |
|                                    |                                                      |                    |                                          | Cd + Pb           | 610 + 350                                | 0.71 + 0.3     |         |
|                                    |                                                      |                    |                                          | Pb edge shielding | 350                                      | 0.3            |         |
|                                    |                                                      |                    |                                          | Indium (4g)       |                                          |                |         |

Supplementary Information \_ Characteristics of dosimeters used for photon dose estimation

Supplementary Table S1 was completed by health physicists using the best available information; however, expert judgment was also necessary.

| Country: Facility (period)       | Dosimeter Type                                       | Dosimeter material | Commercial type             | Filters           | Density thickness (mg.cm <sup>-2</sup> ) | Thickness (mm) | Ref     |
|----------------------------------|------------------------------------------------------|--------------------|-----------------------------|-------------------|------------------------------------------|----------------|---------|
| UK: Magnox-Dungeness (1965-1981) | AERE/RPS:<br>Multi British Sn-Pb                     | Film               | Kodak RM                    | Open window       |                                          |                | (43-50) |
|                                  |                                                      |                    |                             | Plastic           | 50+300                                   | 0.5+3          |         |
|                                  |                                                      |                    |                             | Dural             | 280                                      | 1              |         |
|                                  |                                                      |                    |                             | Sn + Pb           | 520 + 350                                | 0.71 + 0.3     |         |
|                                  |                                                      |                    |                             | Cd + Pb           | 610 + 350                                | 0.71 + 0.3     |         |
|                                  |                                                      |                    |                             | Pb edge shielding | 350                                      | 0.3            |         |
|                                  |                                                      |                    |                             | Indium (4g)       |                                          |                |         |
| UK: Magnox-Dungeness (1981-1997) | AERE/RPS:<br>Multi British Sn-Pb                     | Film               | Kodak type 2                | Open window       |                                          |                | (43-50) |
|                                  |                                                      |                    |                             | Plastic           | 50+300                                   | 0.5+3          |         |
|                                  |                                                      |                    |                             | Dural             | 280                                      | 1              |         |
|                                  |                                                      |                    |                             | Sn + Pb           | 520 + 350                                | 0.71 + 0.3     |         |
|                                  |                                                      |                    |                             | Cd + Pb           | 610 + 350                                | 0.71 + 0.3     |         |
|                                  |                                                      |                    |                             | Pb edge shielding | 350                                      | 0.3            |         |
|                                  |                                                      |                    |                             | Indium (4g)       |                                          |                |         |
| UK: Magnox-HinkleyA (1963-1964)  | Tinplate :<br>Multi Sn/Pb<br>>100mg.cm <sup>-2</sup> | Film               | AERE-Tinplate<br>Ilford PM1 | Open window       |                                          |                | (42)    |
|                                  |                                                      |                    |                             | Fe + Sn           | 250 + 730                                | 0.38 +1        |         |
|                                  |                                                      |                    |                             | Fe + Cd           | 250 + 864                                | 0.38 +1        |         |
| UK: Magnox-HinkleyA (1964-1981)  | AERE/RPS:<br>Multi British Sn-Pb                     | Film               | Kodak RM                    | Open window       |                                          |                | (43-50) |
|                                  |                                                      |                    |                             | Plastic           | 50+300                                   | 0.5+3          |         |
|                                  |                                                      |                    |                             | Dural             | 280                                      | 1              |         |
|                                  |                                                      |                    |                             | Sn + Pb           | 520 + 350                                | 0.71 + 0.3     |         |
|                                  |                                                      |                    |                             | Cd + Pb           | 610 + 350                                | 0.71 + 0.3     |         |
|                                  |                                                      |                    |                             | Pb edge shielding | 350                                      | 0.3            |         |
|                                  |                                                      |                    |                             | Indium (4g)       |                                          |                |         |
| UK: Magnox-HinkleyA (1981-1997)  | AERE/RPS:<br>Multi British Sn-Pb                     | Film               | Kodak type 2                | Open window       |                                          |                | (43-50) |
|                                  |                                                      |                    |                             | Plastic           | 50+300                                   | 0.5+3          |         |
|                                  |                                                      |                    |                             | Dural             | 280                                      | 1              |         |
|                                  |                                                      |                    |                             | Sn + Pb           | 520 + 350                                | 0.71 + 0.3     |         |
|                                  |                                                      |                    |                             | Cd + Pb           | 610 + 350                                | 0.71 + 0.3     |         |
|                                  |                                                      |                    |                             | Pb edge shielding | 350                                      | 0.3            |         |
|                                  |                                                      |                    |                             | Indium (4g)       |                                          |                |         |
| UK: Magnox-Oldbury (1966-1981)   | AERE/RPS:<br>Multi British Sn-Pb                     | Film               | Kodak RM                    | Open window       |                                          |                | (43-50) |
|                                  |                                                      |                    |                             | Plastic           | 50+300                                   | 0.5+3          |         |
|                                  |                                                      |                    |                             | Dural             | 280                                      | 1              |         |
|                                  |                                                      |                    |                             | Sn + Pb           | 520 + 350                                | 0.71 + 0.3     |         |
|                                  |                                                      |                    |                             | Cd + Pb           | 610 + 350                                | 0.71 + 0.3     |         |
|                                  |                                                      |                    |                             | Pb edge shielding | 350                                      | 0.3            |         |
|                                  |                                                      |                    |                             | Indium (4g)       |                                          |                |         |
| UK: Magnox-Oldbury (1981-1997)   | AERE/RPS:<br>Multi British Sn-Pb                     | Film               | Kodak type 2                | Open window       |                                          |                | (43-50) |
|                                  |                                                      |                    |                             | Plastic           | 50+300                                   | 0.5+3          |         |
|                                  |                                                      |                    |                             | Dural             | 280                                      | 1              |         |
|                                  |                                                      |                    |                             | Sn + Pb           | 520 + 350                                | 0.71 + 0.3     |         |
|                                  |                                                      |                    |                             | Cd + Pb           | 610 + 350                                | 0.71 + 0.3     |         |
|                                  |                                                      |                    |                             | Pb edge shielding | 350                                      | 0.3            |         |
|                                  |                                                      |                    |                             | Indium (4g)       |                                          |                |         |

Supplementary Information \_ Characteristics of dosimeters used for photon dose estimation

Supplementary Table S1 was completed by health physicists using the best available information; however, expert judgment was also necessary.

| Country: Facility (period)         | Dosimeter Type                   | Dosimeter material | Commercial type | Filters           | Density thickness (mg.cm <sup>-2</sup> ) | Thickness (mm) | Ref     |
|------------------------------------|----------------------------------|--------------------|-----------------|-------------------|------------------------------------------|----------------|---------|
| UK: Magnox-SizewellA (1963-1982)   | AERE/RPS:<br>Multi British Sn-Pb | Film               | Kodak RM        | Open window       |                                          |                | (43-50) |
|                                    |                                  |                    |                 | Plastic           | 50+300                                   | 0.5+3          |         |
|                                    |                                  |                    |                 | Dural             | 280                                      | 1              |         |
|                                    |                                  |                    |                 | Sn + Pb           | 520 + 350                                | 0.71 + 0.3     |         |
|                                    |                                  |                    |                 | Cd + Pb           | 610 + 350                                | 0.71 + 0.3     |         |
|                                    |                                  |                    |                 | Pb edge shielding | 350                                      | 0.3            |         |
|                                    |                                  |                    |                 | Indium (4g)       |                                          |                |         |
| UK: Magnox-SizewellA (1982-1997)   | AERE/RPS:<br>Multi British Sn-Pb | Film               | Kodak type 2    | Open window       |                                          |                | (43-50) |
|                                    |                                  |                    |                 | Plastic           | 50+300                                   | 0.5+3          |         |
|                                    |                                  |                    |                 | Dural             | 280                                      | 1              |         |
|                                    |                                  |                    |                 | Sn + Pb           | 520 + 350                                | 0.71 + 0.3     |         |
|                                    |                                  |                    |                 | Cd + Pb           | 610 + 350                                | 0.71 + 0.3     |         |
|                                    |                                  |                    |                 | Pb edge shielding | 350                                      | 0.3            |         |
|                                    |                                  |                    |                 | Indium (4g)       |                                          |                |         |
| UK: Magnox-Trawsfynydd (1964-1981) | AERE/RPS:<br>Multi British Sn-Pb | Film               | Kodak RM        | Open window       |                                          |                | (43-50) |
|                                    |                                  |                    |                 | Plastic           | 50+300                                   | 0.5+3          |         |
|                                    |                                  |                    |                 | Dural             | 280                                      | 1              |         |
|                                    |                                  |                    |                 | Sn + Pb           | 520 + 350                                | 0.71 + 0.3     |         |
|                                    |                                  |                    |                 | Cd + Pb           | 610 + 350                                | 0.71 + 0.3     |         |
|                                    |                                  |                    |                 | Pb edge shielding | 350                                      | 0.3            |         |
|                                    |                                  |                    |                 | Indium (4g)       |                                          |                |         |
| UK: Magnox-Trawsfynydd (1981-1997) | AERE/RPS:<br>Multi British Sn-Pb | Film               | Kodak type 2    | Open window       |                                          |                | (43-50) |
|                                    |                                  |                    |                 | Plastic           | 50+300                                   | 0.5+3          |         |
|                                    |                                  |                    |                 | Dural             | 280                                      | 1              |         |
|                                    |                                  |                    |                 | Sn + Pb           | 520 + 350                                | 0.71 + 0.3     |         |
|                                    |                                  |                    |                 | Cd + Pb           | 610 + 350                                | 0.71 + 0.3     |         |
|                                    |                                  |                    |                 | Pb edge shielding | 350                                      | 0.3            |         |
|                                    |                                  |                    |                 | Indium (4g)       |                                          |                |         |
| UK: Magnox-Wylfa (1969-1981)       | AERE/RPS:<br>Multi British Sn-Pb | Film               | Kodak RM        | Open window       |                                          |                | (43-50) |
|                                    |                                  |                    |                 | Plastic           | 50+300                                   | 0.5+3          |         |
|                                    |                                  |                    |                 | Dural             | 280                                      | 1              |         |
|                                    |                                  |                    |                 | Sn + Pb           | 520 + 350                                | 0.71 + 0.3     |         |
|                                    |                                  |                    |                 | Cd + Pb           | 610 + 350                                | 0.71 + 0.3     |         |
|                                    |                                  |                    |                 | Pb edge shielding | 350                                      | 0.3            |         |
|                                    |                                  |                    |                 | Indium (4g)       |                                          |                |         |
| UK: Magnox-Wylfa (1981-1997)       | AERE/RPS:<br>Multi British Sn-Pb | Film               | Kodak type 2    | Open window       |                                          |                | (43-50) |
|                                    |                                  |                    |                 | Plastic           | 50+300                                   | 0.5+3          |         |
|                                    |                                  |                    |                 | Dural             | 280                                      | 1              |         |
|                                    |                                  |                    |                 | Sn + Pb           | 520 + 350                                | 0.71 + 0.3     |         |
|                                    |                                  |                    |                 | Cd + Pb           | 610 + 350                                | 0.71 + 0.3     |         |
|                                    |                                  |                    |                 | Pb edge shielding | 350                                      | 0.3            |         |
|                                    |                                  |                    |                 | Indium (4g)       |                                          |                |         |



Supplementary Information \_ Characteristics of dosimeters used for photon dose estimation

Supplementary Table S1 was completed by health physicists using the best available information; however, expert judgment was also necessary.

| Country: Facility (period)         | Dosimeter Type                   | Dosimeter material | Commercial type                   | Filters           | Density thickness (mg.cm <sup>-2</sup> ) | Thickness (mm) | Ref     |
|------------------------------------|----------------------------------|--------------------|-----------------------------------|-------------------|------------------------------------------|----------------|---------|
| UK: Nuclear-DungenessB (1971-1980) | AERE/RPS:<br>Multi British Sn-Pb | Film               | Black spot (Kodak RM)             | Open window       |                                          |                | (43-50) |
|                                    |                                  |                    |                                   | Plastic           | 50+300                                   | 0.5+3          |         |
|                                    |                                  |                    |                                   | Dural             | 280                                      | 1              |         |
|                                    |                                  |                    |                                   | Sn + Pb           | 520 + 350                                | 0.71 + 0.3     |         |
|                                    |                                  |                    |                                   | Cd + Pb           | 610 + 350                                | 0.71 + 0.3     |         |
|                                    |                                  |                    |                                   | Pb edge shielding | 350                                      | 0.3            |         |
|                                    |                                  |                    |                                   | Indium (4g)       |                                          |                |         |
| UK: Nuclear-DungenessB (1980-1997) | AERE/RPS:<br>Multi British Sn-Pb | Film               | Black spot Kodak type 2           | As above          |                                          |                | (43-50) |
|                                    |                                  |                    |                                   | Open window       |                                          |                |         |
|                                    |                                  |                    |                                   | Plastic           | 50+300                                   | 0.5+3          |         |
|                                    |                                  |                    |                                   | Dural             | 280                                      | 1              |         |
|                                    |                                  |                    |                                   | Sn + Pb           | 520 + 350                                | 0.71 + 0.3     |         |
|                                    |                                  |                    |                                   | Cd + Pb           | 610 + 350                                | 0.71 + 0.3     |         |
|                                    |                                  |                    |                                   | Pb edge shielding | 350                                      | 0.3            |         |
| UK: Nuclear-Hartlepool (1980-1997) | AERE/RPS:<br>Multi British Sn-Pb | Film               | Loxford black spot (Kodak type 2) | Open window       |                                          |                | (43-50) |
|                                    |                                  |                    |                                   | Plastic           | 50+300                                   | 0.5+3          |         |
|                                    |                                  |                    |                                   | Dural             | 280                                      | 1              |         |
|                                    |                                  |                    |                                   | Sn + Pb           | 520 + 350                                | 0.71 + 0.3     |         |
|                                    |                                  |                    |                                   | Cd + Pb           | 610 + 350                                | 0.71 + 0.3     |         |
|                                    |                                  |                    |                                   | Pb edge shielding | 350                                      | 0.3            |         |
|                                    |                                  |                    |                                   | Indium (4g)       |                                          |                |         |
| UK: Nuclear-Heysham1 (1972-1980)   | AERE/RPS:<br>Multi British Sn-Pb | Film               | Kodak RM                          | Open window       |                                          |                | (43-50) |
|                                    |                                  |                    |                                   | Plastic           | 50+300                                   | 0.5+3          |         |
|                                    |                                  |                    |                                   | Dural             | 280                                      | 1              |         |
|                                    |                                  |                    |                                   | Sn + Pb           | 520 + 350                                | 0.71 + 0.3     |         |
|                                    |                                  |                    |                                   | Cd + Pb           | 610 + 350                                | 0.71 + 0.3     |         |
|                                    |                                  |                    |                                   | Pb edge shielding | 350                                      | 0.3            |         |
|                                    |                                  |                    |                                   | Indium (4g)       |                                          |                |         |
| UK: Nuclear-Heysham (1980-1997)    | AERE/RPS:<br>Multi British Sn-Pb | Film               | Kodak type 2                      | Open window       |                                          |                | (43-50) |
|                                    |                                  |                    |                                   | Plastic           | 50+300                                   | 0.5+3          |         |
|                                    |                                  |                    |                                   | Dural             | 280                                      | 1              |         |
|                                    |                                  |                    |                                   | Sn + Pb           | 520 + 350                                | 0.71 + 0.3     |         |
|                                    |                                  |                    |                                   | Cd + Pb           | 610 + 350                                | 0.71 + 0.3     |         |
|                                    |                                  |                    |                                   | Pb edge shielding | 350                                      | 0.3            |         |
|                                    |                                  |                    |                                   | Indium (4g)       |                                          |                |         |
| UK: Nuclear-Hinkley B (1974-1981)  | AERE/RPS:<br>Multi British Sn-Pb | Film               | Kodak RM                          | Open window       |                                          |                | (43-50) |
|                                    |                                  |                    |                                   | Plastic           | 50+300                                   | 0.5+3          |         |
|                                    |                                  |                    |                                   | Dural             | 280                                      | 1              |         |
|                                    |                                  |                    |                                   | Sn + Pb           | 520 + 350                                | 0.71 + 0.3     |         |
|                                    |                                  |                    |                                   | Cd + Pb           | 610 + 350                                | 0.71 + 0.3     |         |
|                                    |                                  |                    |                                   | Pb edge shielding | 350                                      | 0.3            |         |
|                                    |                                  |                    |                                   | Indium (4g)       |                                          |                |         |
| UK: Nuclear-Hinkley B (1981-1997)  | AERE/RPS:<br>Multi British Sn-Pb | Film               | Kodak type 2                      | Open window       |                                          |                | (43-50) |
|                                    |                                  |                    |                                   | Plastic           | 50+300                                   | 0.5+3          |         |
|                                    |                                  |                    |                                   | Dural             | 280                                      | 1              |         |
|                                    |                                  |                    |                                   | Sn + Pb           | 520 + 350                                | 0.71 + 0.3     |         |
|                                    |                                  |                    |                                   | Cd + Pb           | 610 + 350                                | 0.71 + 0.3     |         |
|                                    |                                  |                    |                                   | Pb edge shielding | 350                                      | 0.3            |         |
|                                    |                                  |                    |                                   | Indium (4g)       |                                          |                |         |

Supplementary Information \_ Characteristics of dosimeters used for photon dose estimation

Supplementary Table S1 was completed by health physicists using the best available information; however, expert judgment was also necessary.

| Country: Facility (period)            | Dosimeter Type                     | Dosimeter material | Commercial type                          | Filters           | Density thickness (mg.cm <sup>-2</sup> ) | Thickness (mm) | Ref     |
|---------------------------------------|------------------------------------|--------------------|------------------------------------------|-------------------|------------------------------------------|----------------|---------|
| UK: Nuclear-Sizewell B (1994-1997)    | AERE/RPS:<br>Multi British Sn-Pb   | Film               | Kodak type 2                             | Open window       |                                          |                | (43-50) |
|                                       |                                    |                    |                                          | Plastic           | 50+300                                   | 0.5+3          |         |
|                                       |                                    |                    |                                          | Dural             | 280                                      | 1              |         |
|                                       |                                    |                    |                                          | Sn + Pb           | 520 + 350                                | 0.71 + 0.3     |         |
|                                       |                                    |                    |                                          | Cd + Pb           | 610 + 350                                | 0.71 + 0.3     |         |
|                                       |                                    |                    |                                          | Pb edge shielding | 350                                      | 0.3            |         |
|                                       |                                    |                    |                                          | Indium (4g)       |                                          |                |         |
| UK: Rolls Royce-Aerospace (1957-1961) | RPS/Sutton:<br>Multi British Sn-Pb | Film               | RPS Sutton<br>nylon holder<br>Ilford PM1 | Open window       |                                          |                | (55)    |
|                                       |                                    |                    |                                          | Nylon             | 207                                      | 1.8            |         |
|                                       |                                    |                    |                                          | Sn + nylon        | 730 + 92                                 | 1 + 0.8        |         |
|                                       |                                    |                    |                                          | Dural + nylon     | 252 + 104                                | 0.9 + 0.9      |         |
| UK: Rolls Royce-Aerospace (1961-1995) | AERE/RPS:<br>Multi British Sn-Pb   | Film               | +                                        | Open window       |                                          |                | (43-50) |
|                                       |                                    |                    |                                          | Plastic           | 50+300                                   | 0.5+3          |         |
|                                       |                                    |                    |                                          | Dural             | 280                                      | 1              |         |
|                                       |                                    |                    |                                          | Sn + Pb           | 520 + 350                                | 0.71 + 0.3     |         |
|                                       |                                    |                    |                                          | Cd + Pb           | 610 + 350                                | 0.71 + 0.3     |         |
|                                       |                                    |                    |                                          | Pb edge shielding | 350                                      | 0.3            |         |
|                                       |                                    |                    |                                          | Indium (4g)       |                                          |                |         |
| UK: Rolls Royce-AMD (1960-1961)       | RPS/Sutton:<br>Multi British Sn-Pb | Film               | RPS Sutton<br>nylon holder<br>Ilford PM1 | Open window       |                                          |                | (55)    |
|                                       |                                    |                    |                                          | Nylon             | 207                                      | 1.8            |         |
|                                       |                                    |                    |                                          | Sn + nylon        | 730 + 92                                 | 1 + 0.8        |         |
|                                       |                                    |                    |                                          | Dural + nylon     | 252 + 104                                | 0.9 + 0.9      |         |
| UK: Rolls Royce-AMD (1961-1997)       | AERE/RPS:<br>Multi British Sn-Pb   | Film               | +                                        | Open window       |                                          |                | (43-50) |
|                                       |                                    |                    |                                          | Plastic           | 50+300                                   | 0.5+3          |         |
|                                       |                                    |                    |                                          | Dural             | 280                                      | 1              |         |
|                                       |                                    |                    |                                          | Sn + Pb           | 520 + 350                                | 0.71 + 0.3     |         |
|                                       |                                    |                    |                                          | Cd + Pb           | 610 + 350                                | 0.71 + 0.3     |         |
|                                       |                                    |                    |                                          | Pb edge shielding | 350                                      | 0.3            |         |
|                                       |                                    |                    |                                          | Indium (4g)       |                                          |                |         |
| UK: Rolls Royce-AMS (1962-1997)       | AERE/RPS:<br>Multi British Sn-Pb   | Film               | +                                        | Open window       |                                          |                | (43-50) |
|                                       |                                    |                    |                                          | Plastic           | 50+300                                   | 0.5+3          |         |
|                                       |                                    |                    |                                          | Dural             | 280                                      | 1              |         |
|                                       |                                    |                    |                                          | Sn + Pb           | 520 + 350                                | 0.71 + 0.3     |         |
|                                       |                                    |                    |                                          | Cd + Pb           | 610 + 350                                | 0.71 + 0.3     |         |
|                                       |                                    |                    |                                          | Pb edge shielding | 350                                      | 0.3            |         |
|                                       |                                    |                    |                                          | Indium (4g)       |                                          |                |         |
| UK: SNL/BEG-Hunterston (1963-1981)    | AERE/RPS:<br>Multi British Sn-Pb   | Film               | Kodak RM                                 | Open window       |                                          |                | (43-50) |
|                                       |                                    |                    |                                          | Plastic           | 50+300                                   | 0.5+3          |         |
|                                       |                                    |                    |                                          | Dural             | 280                                      | 1              |         |
|                                       |                                    |                    |                                          | Sn + Pb           | 520 + 350                                | 0.71 + 0.3     |         |
|                                       |                                    |                    |                                          | Cd + Pb           | 610 + 350                                | 0.71 + 0.3     |         |
|                                       |                                    |                    |                                          | Pb edge shielding | 350                                      | 0.3            |         |
|                                       |                                    |                    |                                          | Indium (4g)       |                                          |                |         |

Supplementary Information \_ Characteristics of dosimeters used for photon dose estimation

Supplementary Table S1 was completed by health physicists using the best available information; however, expert judgment was also necessary.

| Country: Facility (period)         | Dosimeter Type                   | Dosimeter material | Commercial type         | Filters           | Density thickness (mg.cm <sup>-2</sup> ) | Thickness (mm) | Ref     |
|------------------------------------|----------------------------------|--------------------|-------------------------|-------------------|------------------------------------------|----------------|---------|
| UK: SNL/BEG-Hunterston (1981-1997) | AERE/RPS:<br>Multi British Sn-Pb | Film               | Black spot Kodak type 2 | Open window       |                                          |                | (43-50) |
|                                    |                                  |                    |                         | Plastic           | 50+300                                   | 0.5+3          |         |
|                                    |                                  |                    |                         | Dural             | 280                                      | 1              |         |
|                                    |                                  |                    |                         | Sn + Pb           | 520 + 350                                | 0.71 + 0.3     |         |
|                                    |                                  |                    |                         | Cd + Pb           | 610 + 350                                | 0.71 + 0.3     |         |
|                                    |                                  |                    |                         | Pb edge shielding | 350                                      | 0.3            |         |
| UK: SNL/BEG-Torness (1986-1997)    | Li plastic filter                | Li based TLD       |                         | Plastic           | 171+840                                  |                |         |

| Country: Facility (period)                                                 | Dosimeter Type     | Dosimeter material | Commercial type                                        | Filters           | Density thickness (mg.cm <sup>-2</sup> ) | Thickness (mm) | Ref |
|----------------------------------------------------------------------------|--------------------|--------------------|--------------------------------------------------------|-------------------|------------------------------------------|----------------|-----|
| USA: Amchitka (1971-1972)                                                  | Multi-element      | Film               | Kodak type 3                                           | Open window       | 103                                      |                |     |
|                                                                            |                    |                    |                                                        | Cd+Ta             | 826                                      |                |     |
|                                                                            |                    |                    |                                                        | Plastic           | 507                                      |                |     |
|                                                                            |                    |                    |                                                        | Ta_Plastic        | 1087                                     |                |     |
| USA: AMES (1953-1961)                                                      | Missing info       | Film               |                                                        | Open window, ???  |                                          |                |     |
| USA: AMES (1962-1965)                                                      | Multi Al-Ag        | Film               | DuPont 558                                             | Open window       |                                          |                |     |
|                                                                            |                    |                    |                                                        | Al                |                                          |                |     |
|                                                                            |                    |                    |                                                        | Ag                |                                          |                |     |
|                                                                            |                    |                    |                                                        | Cd                | ~1000                                    |                |     |
| USA: AMES (1954-1957) Synchrotron                                          | Multi Al-Ag        | Film               | Kodak type 552/BNL                                     | Open              |                                          |                |     |
|                                                                            |                    |                    |                                                        | Al                | 439                                      |                |     |
|                                                                            |                    |                    |                                                        | Cd                | 945                                      |                |     |
|                                                                            |                    |                    |                                                        | plastic           |                                          |                |     |
| USA: AMES (1957-1963) Synchrotron                                          | Multi Cu-Pb        | Film               | Dupont 556/NCA                                         | Open window       |                                          |                |     |
|                                                                            |                    |                    |                                                        | Pb                | ~1000                                    |                |     |
|                                                                            |                    |                    |                                                        | Cd                | 150                                      |                |     |
|                                                                            |                    |                    |                                                        | Cu                | 300                                      |                |     |
|                                                                            |                    |                    |                                                        | plastic           | 7                                        |                |     |
| USA: AMES (1966-1981)                                                      | Multi-element      | Film               | Dupont 556                                             | Open window       |                                          |                |     |
|                                                                            |                    |                    |                                                        | Cu                |                                          |                |     |
|                                                                            |                    |                    |                                                        | Al                |                                          |                |     |
|                                                                            |                    |                    |                                                        | Cd                |                                          |                |     |
|                                                                            |                    |                    |                                                        | plastic           |                                          |                |     |
| USA: AMES (1980-1994)                                                      | Li other filters   | Li based TLD       | Landauer                                               | Open window/Mylar | 17                                       |                |     |
| USA: AMES (1995-1996)                                                      |                    |                    | Siemens SLD 100                                        | Plastic           | 1000                                     |                |     |
|                                                                            |                    |                    |                                                        | Plastic + Cu      | 242                                      |                |     |
| USA: AMES (1996-1998)<br>USA: AMES (1998-2004)<br>USA: AMES (2005-present) | Li other filters   | Li based TLD       | ICN 760<br>Siemens SLD 760<br>Global dosimetry TLD 760 | Open window/Mylar | 7                                        |                |     |
|                                                                            |                    |                    |                                                        | Plastic           | 600                                      |                |     |
|                                                                            |                    |                    |                                                        | Plastic + Cu      | 242                                      |                |     |
|                                                                            |                    |                    |                                                        | Plastic           | 600                                      |                |     |
| USA: Argonne National Lab. (1945-1961)                                     | One elem. Sn/Cd/Ag | Film               |                                                        | Open, Cd          |                                          |                |     |

Supplementary Information \_ Characteristics of dosimeters used for photon dose estimation

Supplementary Table S1 was completed by health physicists using the best available information; however, expert judgment was also necessary.

| Country: Facility (period)                         | Dosimeter Type                  | Dosimeter material | Commercial type            | Filters           | Density thickness (mg.cm <sup>-2</sup> ) | Thickness (mm) | Ref  |
|----------------------------------------------------|---------------------------------|--------------------|----------------------------|-------------------|------------------------------------------|----------------|------|
| USA: Argonne National Lab. (1962-1987)             | Multi Al-Ag                     | Film               | DuPont 553,558 (INEL/NRTS) | Open window       |                                          |                |      |
|                                                    |                                 |                    |                            | Al                | 175                                      |                |      |
|                                                    |                                 |                    |                            | Ag                | 203                                      |                |      |
|                                                    |                                 |                    |                            | Cd                | 950                                      |                |      |
| USA: Argonne National Lab. (1988-2005)             | Li Al-plastic filter            | Li based TLD       | Panasonic 814AS4           | Al/plastic        | 16+58+600+600                            |                | (56) |
| USA: Batelle Memorial Columbus (1953-1967)         | One elem. Sn/Cd/Ag              | Film               | Landauer/Dupont            | Open, Cd          | 1000                                     | 1              |      |
| USA: Batelle Memorial Columbus (1968-1969)         | Multi element                   | Film               | Eberline FD11 Dupont 556   | Open window       | 7                                        |                |      |
|                                                    |                                 |                    |                            | Al                | 540                                      |                |      |
|                                                    |                                 |                    |                            | Tn+Cd             | 1600                                     |                |      |
|                                                    |                                 |                    |                            | plastic           | 350                                      |                |      |
| USA: Batelle Memorial Columbus(1969-1984)          | Multi element                   | Film               | Landauer/Kodak type 3      | Open window       | 7                                        |                |      |
|                                                    |                                 |                    |                            | Plastic           | 350                                      |                |      |
|                                                    |                                 |                    |                            | Al                | 540                                      |                |      |
|                                                    |                                 |                    |                            | Pb                | 1000                                     |                |      |
| USA: Batelle Memorial Columbus(1985-1994)          | Li other filters                | Li based TLD       | Landauer                   | Mylar             | 17                                       |                |      |
|                                                    |                                 |                    |                            | Plastic           | 1000                                     |                |      |
|                                                    |                                 |                    |                            | Plastic + Cu      | 242                                      |                |      |
| USA: Batelle Memorial Columbus(1994-1996)          | Li other filters                | Li based TLD       | Siemens/ICN                | Open window/Mylar | 17                                       |                |      |
|                                                    |                                 |                    |                            | Plastic           | 600                                      |                |      |
|                                                    |                                 |                    |                            | Plastic + Cu      | 242                                      |                |      |
|                                                    |                                 |                    |                            | Plastic           | 600                                      |                |      |
| USA: Batelle Memorial Columbus (1997-2005)         | Li other filters                | Li based TLD       |                            | Open window       | 7                                        |                |      |
|                                                    |                                 |                    |                            | Plastic           | 175                                      |                |      |
|                                                    |                                 |                    |                            | Al+ Plastic       | 275                                      |                |      |
|                                                    |                                 |                    |                            | Sn+ Al+ Plastic   | 515                                      |                |      |
| USA: Bettis Pittsburgh PA (1955-1956) <sup>°</sup> | Multi Sn 300mg.cm <sup>-2</sup> | Film               | Eastman, DF-7              | Open window       | ~30                                      | 0              |      |
|                                                    |                                 |                    |                            | SS / Cd           | 400 / 865                                | 0.51 / 1       |      |
| USA: Bettis Pittsburgh PA (1957-1969) <sup>°</sup> |                                 |                    | Dupont SX-233              | Open window       | ~30                                      | 0              |      |
|                                                    |                                 |                    |                            | SS / Cd           | 400 / 865                                | 0.51 / 1       |      |
| USA: Bettis Pittsburgh PA (1969-1972) <sup>°</sup> |                                 |                    | Kodak Type 3               | Open window       | ~30                                      | 0              |      |
|                                                    |                                 |                    |                            | SS / Cd           | 400 / 865                                | 0.51 / 1       |      |
| USA: Bettis Pittsburgh PA (1972-1975) <sup>°</sup> | Li other filters                | Li based TLD       | One chip                   |                   |                                          |                |      |
| USA: Bettis Pittsburgh PA (1975-1992) <sup>°</sup> | Li other filters                | Li based TLD       | Two chips                  | Open window       |                                          |                |      |
|                                                    |                                 |                    |                            | Cd                | 330                                      | 0.381          |      |
| USA: Bettis Pittsburgh PA (1992-2005) <sup>°</sup> | Li other filters                | Li based TLD       | Four chips                 | ABS               | 600                                      | 5.77           |      |
|                                                    |                                 |                    |                            | ABS + Cu:Al       | 242 + 91                                 | 2.31 + 0.12    |      |
|                                                    |                                 |                    |                            | Mylar + Teflon    | 14 + 3                                   | 0.04 +0.03     |      |
|                                                    |                                 |                    |                            | ABS               | 600                                      | 5.77           |      |

<sup>°</sup> In the absence of specific information, Porthmouth Naval Shipyard dosimetry information was considered as a default for other naval facilities.

Supplementary Information \_ Characteristics of dosimeters used for photon dose estimation

Supplementary Table S1 was completed by health physicists using the best available information; however, expert judgment was also necessary.

| Country: Facility (period)               | Dosimeter Type     | Dosimeter material                                                                                                                                                                                                       | Commercial type                 | Filters           | Density thickness (mg.cm <sup>-2</sup> ) | Thickness (mm) | Ref     |
|------------------------------------------|--------------------|--------------------------------------------------------------------------------------------------------------------------------------------------------------------------------------------------------------------------|---------------------------------|-------------------|------------------------------------------|----------------|---------|
| USA: Braidwood Station (1985-1986)       | Multi Cu-Pb        | Film                                                                                                                                                                                                                     | Landauer Film type G            | Open window       |                                          |                |         |
|                                          |                    |                                                                                                                                                                                                                          |                                 | Plastic           | 7                                        |                |         |
|                                          |                    |                                                                                                                                                                                                                          |                                 | Plastic           | 160                                      |                |         |
|                                          |                    |                                                                                                                                                                                                                          |                                 | Plastic           | 310                                      |                |         |
|                                          |                    |                                                                                                                                                                                                                          |                                 | Plastic + Al      | 340                                      |                |         |
| 60%Pb+40%Sn +alloy+plastic               | 1630               |                                                                                                                                                                                                                          |                                 |                   |                                          |                |         |
| USA: Braidwood Station (1986-1999)       | Ca and mixed       | <sup>n</sup> Li <sub>2</sub> <sup>n</sup> B <sub>4</sub> O <sub>7</sub><br><sup>n</sup> Li <sub>2</sub> <sup>n</sup> B <sub>4</sub> O <sub>7</sub><br>Ca <sub>2</sub> SO <sub>4</sub><br>Ca <sub>2</sub> SO <sub>4</sub> | Panasonic UD-802                | Mylar             | 28                                       |                | (56,57) |
|                                          |                    |                                                                                                                                                                                                                          |                                 | Plastic           | 310                                      |                |         |
|                                          |                    |                                                                                                                                                                                                                          |                                 | Plastic           | 310                                      |                |         |
|                                          |                    |                                                                                                                                                                                                                          |                                 | Pb                | 960                                      |                |         |
| USA: Brookhaven National Lab (1947-1954) | One elem. Sn/Cd/Ag | Film                                                                                                                                                                                                                     | Dupont 552 (BNL/ORNL)           | Open, Cd          | 945                                      |                |         |
| USA: Brookhaven National Lab (1955-1985) | Multi Al-Ag        | Film                                                                                                                                                                                                                     | Kodak Typ. 2 (BNL/ORNL)         | Open              |                                          |                |         |
|                                          |                    |                                                                                                                                                                                                                          |                                 | Al                | 439                                      |                |         |
|                                          |                    |                                                                                                                                                                                                                          |                                 | Cd                | 945                                      |                |         |
| USA: Brookhaven National Lab (1986-1993) | Multi Al-Ag        | Film                                                                                                                                                                                                                     | Kodak Typ. 3 (Landauer)         | Open window       |                                          |                |         |
|                                          |                    |                                                                                                                                                                                                                          |                                 | Al                | 439                                      |                |         |
|                                          |                    |                                                                                                                                                                                                                          |                                 | Cd                | 945                                      |                |         |
| USA: Brookhaven National Lab (1994-1995) | Multi Al-Ag        | Film                                                                                                                                                                                                                     | Kodak Typ. 3 (BNL/ORNL)         | Open              |                                          |                |         |
|                                          |                    |                                                                                                                                                                                                                          |                                 | Al                | 439                                      |                |         |
|                                          |                    |                                                                                                                                                                                                                          |                                 | Cd                | 945                                      |                |         |
| USA: Brookhaven National Lab (1996-2005) | Li other filters   | Li based TLD                                                                                                                                                                                                             | Harshaw                         | Open window/Mylar | 17                                       |                |         |
|                                          |                    |                                                                                                                                                                                                                          |                                 | Plastic           | 300                                      |                |         |
|                                          |                    |                                                                                                                                                                                                                          |                                 | Plastic + Cu      | 333                                      |                |         |
|                                          |                    |                                                                                                                                                                                                                          |                                 | Plastic+ Teflon   | 1000                                     |                |         |
| USA: Byron Station (1982-1988)           | Multi Cu-Pb        | Film                                                                                                                                                                                                                     | Landauer Film type G            | Open window       |                                          |                |         |
|                                          |                    |                                                                                                                                                                                                                          |                                 | Plastic           | 7                                        |                |         |
|                                          |                    |                                                                                                                                                                                                                          |                                 | Plastic           | 160                                      |                |         |
|                                          |                    |                                                                                                                                                                                                                          |                                 | Plastic           | 310                                      |                |         |
|                                          |                    |                                                                                                                                                                                                                          |                                 | Plastic + Al      | 340                                      |                |         |
| 60%Pb+40%Sn +alloy+plastic               | 1630               |                                                                                                                                                                                                                          |                                 |                   |                                          |                |         |
| USA: Byron Station (1988-1999)           | Ca and mixed       | <sup>n</sup> Li <sub>2</sub> <sup>n</sup> B <sub>4</sub> O <sub>7</sub><br><sup>n</sup> Li <sub>2</sub> <sup>n</sup> B <sub>4</sub> O <sub>7</sub><br>Ca <sub>2</sub> SO <sub>4</sub><br>Ca <sub>2</sub> SO <sub>4</sub> | Panasonic UD-802                | Mylar             | 28                                       |                | (56,57) |
|                                          |                    |                                                                                                                                                                                                                          |                                 | Plastic           | 310                                      |                |         |
|                                          |                    |                                                                                                                                                                                                                          |                                 | Plastic           | 310                                      |                |         |
|                                          |                    |                                                                                                                                                                                                                          |                                 | Pb                | 960                                      |                |         |
| USA: Catawba Station (1985-1992)         | Ca and mixed       | CaSO <sub>4</sub>                                                                                                                                                                                                        | Teledyne CaSO <sub>4</sub> PB-3 | Open window       | 7                                        |                |         |
|                                          |                    |                                                                                                                                                                                                                          |                                 | Teflon            | 1000                                     |                |         |
|                                          |                    |                                                                                                                                                                                                                          |                                 | Cu                | 1000                                     |                |         |
|                                          |                    |                                                                                                                                                                                                                          |                                 | Cd                | 1000                                     |                |         |
| USA: Catawba Station (1993-1999)         | Li other filters   | LiF TLD                                                                                                                                                                                                                  | Harshaw 8805 system             | Plastic/Cu        | 333                                      |                |         |
|                                          |                    |                                                                                                                                                                                                                          |                                 | Plastic/Teflon    | 1000                                     |                |         |
|                                          |                    |                                                                                                                                                                                                                          |                                 | Mylar             | 17                                       |                |         |
|                                          |                    |                                                                                                                                                                                                                          |                                 | Plastic           | 300                                      |                |         |

Supplementary Information \_ Characteristics of dosimeters used for photon dose estimation

Supplementary Table S1 was completed by health physicists using the best available information; however, expert judgment was also necessary.

| Country: Facility (period)                          | Dosimeter Type                  | Dosimeter material                                                                                                                                                                                                         | Commercial type                       | Filters                    | Density thickness (mg.cm <sup>-2</sup> ) | Thickness (mm) | Ref     |
|-----------------------------------------------------|---------------------------------|----------------------------------------------------------------------------------------------------------------------------------------------------------------------------------------------------------------------------|---------------------------------------|----------------------------|------------------------------------------|----------------|---------|
| USA: Charleston Shipyard (1964-1969) <sup>c</sup>   |                                 |                                                                                                                                                                                                                            | Dupont SX-233                         | Open window                | ~30                                      | 0              |         |
|                                                     |                                 |                                                                                                                                                                                                                            |                                       | SS / Cd                    | 400 / 865                                | 0.51 / 1       |         |
| USA: Charleston Shipyard (1969-1974) <sup>c</sup>   |                                 |                                                                                                                                                                                                                            | Kodak Type 3                          | Open window                | ~30                                      | 0              |         |
|                                                     |                                 |                                                                                                                                                                                                                            |                                       | SS / Cd                    | 400 / 865                                | 0.51 / 1       |         |
| USA: Charleston Shipyard (1974-2005) <sup>c</sup>   | Ca and mixed                    | CaF <sub>2</sub>                                                                                                                                                                                                           | Harshaw bulb style                    | Glass enclosed Sn/Pb       |                                          |                |         |
| USA: Clinton Power Station (1982-1986)              | Ca and mixed                    | CaSO <sub>4</sub>                                                                                                                                                                                                          | Teledyne CaSO <sub>4</sub> PB-3       | Open window                | 7                                        |                |         |
|                                                     |                                 |                                                                                                                                                                                                                            |                                       | Teflon                     | 1000                                     |                |         |
|                                                     |                                 |                                                                                                                                                                                                                            |                                       | Cu                         | 1000                                     |                |         |
|                                                     |                                 |                                                                                                                                                                                                                            |                                       | Cd                         | 1000                                     |                |         |
| USA: Clinton Power Station (1986-1992)              |                                 | LiF TLD                                                                                                                                                                                                                    | Eberline                              | Mylar                      | 10                                       |                |         |
|                                                     |                                 |                                                                                                                                                                                                                            |                                       | Mylar / Plastic            | 285                                      |                |         |
|                                                     |                                 |                                                                                                                                                                                                                            |                                       | Mylar / Plastic            | 285                                      |                |         |
| USA: Clinton Power Station (1992-1999)              | Ca and mixed                    | <sup>6</sup> Li <sub>2</sub> <sup>11</sup> B <sub>4</sub> O <sub>7</sub><br><sup>7</sup> Li <sub>2</sub> <sup>11</sup> B <sub>4</sub> O <sub>7</sub><br>Ca <sub>2</sub> SO <sub>4</sub><br>Ca <sub>2</sub> SO <sub>4</sub> | Panasonic UD-802 ISA model 820 Holder | Mylar                      | 19                                       |                | (56,57) |
|                                                     |                                 |                                                                                                                                                                                                                            |                                       | Plastic                    | 345                                      |                |         |
|                                                     |                                 |                                                                                                                                                                                                                            |                                       | Plastic                    | 345                                      |                |         |
|                                                     |                                 |                                                                                                                                                                                                                            |                                       | Pb                         | 1045                                     |                |         |
| USA: Comanche Peak Station (1983-1999)              | Ca and mixed                    | <sup>n</sup> Li <sub>2</sub> <sup>n</sup> B <sub>4</sub> O <sub>7</sub><br><sup>n</sup> Li <sub>2</sub> <sup>n</sup> B <sub>4</sub> O <sub>7</sub><br>Ca <sub>2</sub> SO <sub>4</sub><br>Ca <sub>2</sub> SO <sub>4</sub>   | Panasonic UD-802 Landauer service     | Mylar                      | 19                                       |                | (56,57) |
|                                                     |                                 |                                                                                                                                                                                                                            |                                       | Plastic                    | 340                                      |                |         |
|                                                     |                                 |                                                                                                                                                                                                                            |                                       | Plastic                    | 340                                      |                |         |
|                                                     |                                 |                                                                                                                                                                                                                            |                                       | Pb                         | 1060                                     |                |         |
| USA: Davis Besse (1977-1997)                        | Ca and mixed                    | CaSO <sub>4</sub>                                                                                                                                                                                                          | Teledyne CaSO <sub>4</sub> PB-5       | Al, Cu and Cd filters      | ?                                        |                |         |
| USA: Davis Besse (1997-1999)                        | Li other filters                | LiF TLD                                                                                                                                                                                                                    | Harshaw 8805 system                   | Plastic/Cu                 | 345                                      |                |         |
|                                                     |                                 |                                                                                                                                                                                                                            |                                       | Plastic/Teflon             | 1000                                     |                |         |
|                                                     |                                 |                                                                                                                                                                                                                            |                                       | Mylar                      | 17                                       |                |         |
|                                                     |                                 |                                                                                                                                                                                                                            |                                       | Plastic                    | 312                                      |                |         |
| USA: Dresden (1960-1985)                            | Multi Cu-Pb                     | Film                                                                                                                                                                                                                       | Landauer Film type G                  | Open window                |                                          |                |         |
|                                                     |                                 |                                                                                                                                                                                                                            |                                       | Plastic                    | 7                                        |                |         |
|                                                     |                                 |                                                                                                                                                                                                                            |                                       | Plastic                    | 160                                      |                |         |
|                                                     |                                 |                                                                                                                                                                                                                            |                                       | Plastic                    | 310                                      |                |         |
|                                                     |                                 |                                                                                                                                                                                                                            |                                       | Plastic + Al               | 340                                      |                |         |
|                                                     |                                 |                                                                                                                                                                                                                            |                                       | 60%Pb+40%Sn +alloy+plastic | 1630                                     |                |         |
| USA: Dresden (1985-1999)                            | Ca and mixed                    | <sup>n</sup> Li <sub>2</sub> <sup>n</sup> B <sub>4</sub> O <sub>7</sub><br><sup>n</sup> Li <sub>2</sub> <sup>n</sup> B <sub>4</sub> O <sub>7</sub><br>Ca <sub>2</sub> SO <sub>4</sub><br>Ca <sub>2</sub> SO <sub>4</sub>   | Panasonic UD-802                      | Mylar                      | 28                                       |                | (56,57) |
|                                                     |                                 |                                                                                                                                                                                                                            |                                       | Plastic                    | 310                                      |                |         |
|                                                     |                                 |                                                                                                                                                                                                                            |                                       | Plastic                    | 310                                      |                |         |
|                                                     |                                 |                                                                                                                                                                                                                            |                                       | Pb                         | 960                                      |                |         |
| USA: Electric Boat, Groton (1950-1952) <sup>c</sup> | One elem. Pb                    | Film                                                                                                                                                                                                                       | Kodak type 3                          | Open, Pb                   | ~30, 58                                  | 0.05           |         |
| USA: Electric Boat, Groton (1952-1956) <sup>c</sup> | Multi Sn 300mg.cm <sup>-2</sup> | Film                                                                                                                                                                                                                       | Eastman, DF-7                         | Open window                | ~30                                      | 0              |         |
|                                                     |                                 |                                                                                                                                                                                                                            |                                       | SS / Cd                    | 400 / 865                                | 0.51 / 1       |         |
| USA: Electric Boat, Groton (1957-1969) <sup>c</sup> |                                 |                                                                                                                                                                                                                            | Dupont SX-233                         | Open window                | ~30                                      | 0              |         |
|                                                     |                                 |                                                                                                                                                                                                                            |                                       | SS / Cd                    | 400 / 865                                | 0.51 / 1       |         |
| USA: Electric Boat, Groton (1969-1974) <sup>c</sup> |                                 |                                                                                                                                                                                                                            | Kodak Type 3                          | Open window                | ~30                                      | 0              |         |
|                                                     |                                 |                                                                                                                                                                                                                            |                                       | SS / Cd                    | 400 / 865                                | 0.51 / 1       |         |
| USA: Electric Boat, Groton (1974-2005) <sup>c</sup> | Ca and mixed                    | CaF <sub>2</sub>                                                                                                                                                                                                           | Harshaw bulb style                    | Glass enclosed Sn/Pb       |                                          |                |         |

Supplementary Information \_ Characteristics of dosimeters used for photon dose estimation

Supplementary Table S1 was completed by health physicists using the best available information; however, expert judgment was also necessary.

| Country: Facility (period)                        | Dosimeter Type     | Dosimeter material                                                                                                                                                                                                         | Commercial type       | Filters                                                | Density thickness (mg.cm <sup>-2</sup> ) | Thickness (mm) | Ref     |
|---------------------------------------------------|--------------------|----------------------------------------------------------------------------------------------------------------------------------------------------------------------------------------------------------------------------|-----------------------|--------------------------------------------------------|------------------------------------------|----------------|---------|
| USA: Fermi (pre 1970)                             |                    | Film                                                                                                                                                                                                                       | Landauer/Kodak type 2 | ?                                                      |                                          |                |         |
| USA: Fermi (1970-2000)                            | TLD                | Li based TLD                                                                                                                                                                                                               |                       | brass<br>Al<br>Plastic<br>Kapton                       |                                          |                |         |
| USA: Fermi (2000-2005)                            | OSL                | Al <sub>2</sub> O <sub>3</sub>                                                                                                                                                                                             | Landauer OSL          | ?                                                      |                                          |                |         |
| USA: Fermi Station (1984-1999)                    | Ca and mixed       | <sup>6</sup> Li <sub>2</sub> <sup>10</sup> B <sub>4</sub> O <sub>7</sub><br><sup>6</sup> Li <sub>2</sub> <sup>10</sup> B <sub>4</sub> O <sub>7</sub><br>Ca <sub>2</sub> SO <sub>4</sub><br>Ca <sub>2</sub> SO <sub>4</sub> | Panasonic UD-802      | Mylar<br>Plastic<br>Plastic<br>Pb                      | 34<br>371<br>371<br>1071                 |                | (56,57) |
| USA: Feed Materials Production Center (1951-1954) | One elem. Sn/Cd/Ag | Film                                                                                                                                                                                                                       | Dupont 552            | Open, Cd                                               | ~1000                                    | 1              |         |
| USA: Feed Materials Production Center (1954-1985) | Multi Cu-Pb        | Film                                                                                                                                                                                                                       | ORNL-Dupont 552       | Open window<br>Pb<br>Cd<br>Cu<br>plastic               | ~1000<br>150<br>300<br>7                 |                |         |
| USA: Feed Materials Production Center (1985-2005) | Ca and mixed       | Li and Ca based TLD                                                                                                                                                                                                        | Panasonic UD-802      | Teflon<br>Plastic+mylar<br>Plastic+mylar<br>Pb         | 14<br>68<br>160<br>828                   |                | (56,57) |
| USA: Hanford (1944-1956)                          | One elem. Sn/Cd/Ag | Film                                                                                                                                                                                                                       | DuPont 552            | Open, Ag                                               | 1050                                     | 1              | (58-60) |
| USA: Hanford (1957-1962)                          | Multi Al-Ag        | Film                                                                                                                                                                                                                       | DuPont 552            | Open window<br>Al<br>Ag                                | 132<br>1050+137                          | 0.49<br>1+0.13 | (58-60) |
| USA: Hanford (1962-1971)                          | Multi Al-Ag        | Film                                                                                                                                                                                                                       | DuPont 558            | Open window<br>Plastic<br>Fe + plastic<br>Ta + plastic | 130<br>20+273<br>843+267                 | 0.025<br>0.5   | (58-60) |
| USA: Hanford (1972-1995)                          | Li other filters   | Li based TLD                                                                                                                                                                                                               | Five chips            | Open window<br>Al<br>Cd<br>Sn<br>Sn                    | 379<br>912<br>980<br>912                 |                | (58-60) |
| USA: Hanford (1995-1997)                          | Li other filters   | Li based TLD                                                                                                                                                                                                               | Harshaw 8825          | Open<br>plastic<br>Sn<br>Cu                            | ~1000                                    |                | (58-60) |
| USA: Idaho National Laboratory (1951-1956)        | One elem. Sn/Cd/Ag | Film                                                                                                                                                                                                                       | Kodak/Dupont type 552 | Open, Cd                                               | ~1000                                    | 1              |         |
| USA: Idaho National Laboratory (1957-1965)        | Multi Al-Ag        | Film                                                                                                                                                                                                                       | DuPont 552            | Open window<br>Al<br>Ag<br>Cd                          | 175<br>203<br>950                        |                |         |
| USA: Idaho National Laboratory (1966-1985)        | Li Al filter       | Li based TLD                                                                                                                                                                                                               | Two chips             | Open window<br>Al(Cd)                                  | 203(950)                                 |                |         |

Supplementary Information \_ Characteristics of dosimeters used for photon dose estimation

Supplementary Table S1 was completed by health physicists using the best available information; however, expert judgment was also necessary.

| Country: Facility (period)                            | Dosimeter Type       | Dosimeter material                                                                                                                                                                                                       | Commercial type                      | Filters                    | Density thickness (mg.cm <sup>-2</sup> ) | Thickness (mm) | Ref     |
|-------------------------------------------------------|----------------------|--------------------------------------------------------------------------------------------------------------------------------------------------------------------------------------------------------------------------|--------------------------------------|----------------------------|------------------------------------------|----------------|---------|
| USA: Idaho National Laboratory (1986-1997)            | Li Al-plastic filter | Li based TLD                                                                                                                                                                                                             | Panasonic 814 / 808                  | Al/plastic                 | 16+58+600+600                            |                | (56)    |
| USA: Indian Point (1973-1985)                         | Multi Cu-Pb          | Film                                                                                                                                                                                                                     | Landauer Film type G                 | Open window                |                                          |                |         |
|                                                       |                      |                                                                                                                                                                                                                          |                                      | Plastic                    | 7                                        |                |         |
|                                                       |                      |                                                                                                                                                                                                                          |                                      | Plastic                    | 160                                      |                |         |
|                                                       |                      |                                                                                                                                                                                                                          |                                      | Plastic                    | 310                                      |                |         |
|                                                       |                      |                                                                                                                                                                                                                          |                                      | Plastic + Al               | 340                                      |                |         |
|                                                       |                      |                                                                                                                                                                                                                          |                                      | 60%Pb+40%Sn +alloy+plastic | 1630                                     |                |         |
| USA: Indian Point (1985-1999)                         | Ca and mixed         | Li and Ca based TLD                                                                                                                                                                                                      | Panasonic UD-802                     | Mylar                      | 14                                       |                | (56,57) |
|                                                       |                      |                                                                                                                                                                                                                          |                                      | Plastic+mylar              | 320                                      |                |         |
|                                                       |                      |                                                                                                                                                                                                                          |                                      | Plastic+mylar              | 320                                      |                |         |
|                                                       |                      |                                                                                                                                                                                                                          |                                      | Pb                         | 1020                                     | 0.7            |         |
| USA: Kansas City plant (1950-1972)                    | One elem. Sn/Cd/Ag   | Film                                                                                                                                                                                                                     | Dupont 558, Kodak typ.2              | Open, Cd                   | 865                                      |                |         |
| USA: Kansas City plant (1973-1982)                    | Li Al filters        | Li based TLD                                                                                                                                                                                                             |                                      | Mylar                      | 10                                       |                |         |
|                                                       |                      |                                                                                                                                                                                                                          |                                      | Al                         | 285                                      |                |         |
| USA: Kansas City plant (1983-1990)                    | Li Al filters        | Li based TLD                                                                                                                                                                                                             |                                      | Mylar                      | 10                                       |                |         |
|                                                       |                      |                                                                                                                                                                                                                          |                                      | Al                         | 285                                      |                |         |
|                                                       |                      |                                                                                                                                                                                                                          |                                      | Al                         | 285                                      |                |         |
| USA: Kansas City plant (1991-2000)                    | Li other filters     | Li based TLD                                                                                                                                                                                                             | Landauer (3 chipTLD700)              | Mylar                      | 17                                       |                |         |
|                                                       |                      |                                                                                                                                                                                                                          |                                      | Plastic                    | 1000                                     |                |         |
|                                                       |                      |                                                                                                                                                                                                                          |                                      | Plastic + Cu               | 333                                      |                |         |
| USA: Kansas City plant (2000-2005)                    |                      | Al <sub>2</sub> O <sub>3</sub> TLD                                                                                                                                                                                       | Landauer OSL                         | Sn                         |                                          |                |         |
| USA: Kewaunee (1973-1995)                             |                      | LiF TLD                                                                                                                                                                                                                  | Eberline                             | Mylar                      | 10                                       |                |         |
|                                                       |                      |                                                                                                                                                                                                                          |                                      | Mylar / Plastic            | 285                                      |                |         |
|                                                       |                      |                                                                                                                                                                                                                          |                                      | Mylar / Plastic            | 285                                      |                |         |
| USA: Kewaunee (1995-1998)                             | Li other filters     | LiF TLD                                                                                                                                                                                                                  | Landauer-Alnor TLD-100-K1            | Mylar                      | 7                                        |                |         |
|                                                       |                      |                                                                                                                                                                                                                          |                                      | Mylar/Plastic              | 70                                       |                |         |
|                                                       |                      |                                                                                                                                                                                                                          |                                      | Sn/Al/Plastic              | 495                                      |                |         |
|                                                       |                      |                                                                                                                                                                                                                          |                                      | Al/Plastic                 | 275                                      |                |         |
| USA: Kewaunee (1998-1999)                             | Ca and mixed         | <sup>6</sup> Li <sub>2</sub> <sup>9</sup> B <sub>4</sub> O <sub>7</sub><br><sup>7</sup> Li <sub>2</sub> <sup>9</sup> B <sub>4</sub> O <sub>7</sub><br>Ca <sub>2</sub> SO <sub>4</sub><br>Ca <sub>2</sub> SO <sub>4</sub> | Panasonic UD-802<br>Landauer service | Mylar                      | 19                                       |                | (56,57) |
|                                                       |                      |                                                                                                                                                                                                                          |                                      | Plastic                    | 331                                      |                |         |
|                                                       |                      |                                                                                                                                                                                                                          |                                      | Plastic                    | 331                                      |                |         |
|                                                       |                      |                                                                                                                                                                                                                          |                                      | Pb                         | 1061                                     |                |         |
| USA: Knolls Atomic Power lab (1958-1969) <sup>c</sup> |                      |                                                                                                                                                                                                                          | Dupont SX-233                        | Open window                | ~30                                      | 0              |         |
|                                                       |                      |                                                                                                                                                                                                                          |                                      | SS / Cd                    | 400 / 865                                | 0.51 / 1       |         |
| USA: Knolls Atomic Power lab (1969-1973) <sup>c</sup> |                      |                                                                                                                                                                                                                          | Kodak Type 3                         | Open window                | ~30                                      | 0              |         |
|                                                       |                      |                                                                                                                                                                                                                          |                                      | SS / Cd                    | 400 / 865                                | 0.51 / 1       |         |
| USA: Knolls Atomic Power lab (1973-1992) <sup>c</sup> | Li other filters     | Li based TLD                                                                                                                                                                                                             | Two chips                            | Open window                |                                          |                |         |
| USA: Knolls Atomic Power lab (1992-2005) <sup>c</sup> | Li other filters     | Li based TLD                                                                                                                                                                                                             | Four chips                           | Cd                         | 330                                      | 0.381          |         |
|                                                       |                      |                                                                                                                                                                                                                          |                                      | ABS                        | 600                                      | 5.77           |         |
|                                                       |                      |                                                                                                                                                                                                                          |                                      | ABS + Cu:Al                | 242 + 91                                 | 2.31 + 0.12    |         |
|                                                       |                      |                                                                                                                                                                                                                          |                                      | Mylar + Teflon             | 14 + 3                                   | 0.04 +0.03     |         |
|                                                       |                      |                                                                                                                                                                                                                          |                                      | ABS                        | 600                                      | 5.77           |         |



Supplementary Information \_ Characteristics of dosimeters used for photon dose estimation

Supplementary Table S1 was completed by health physicists using the best available information; however, expert judgment was also necessary.

| Country: Facility (period)                        | Dosimeter Type     | Dosimeter material                                                                                                                                                                                                       | Commercial type                        | Filters                    | Density thickness (mg.cm <sup>-2</sup> ) | Thickness (mm) | Ref     |
|---------------------------------------------------|--------------------|--------------------------------------------------------------------------------------------------------------------------------------------------------------------------------------------------------------------------|----------------------------------------|----------------------------|------------------------------------------|----------------|---------|
| USA: Lasalle County Station (1978-1986)           | Multi Cu-Pb        | Film                                                                                                                                                                                                                     | Landauer Film type G                   | Open window                |                                          |                |         |
|                                                   |                    |                                                                                                                                                                                                                          |                                        | Plastic                    | 7                                        |                |         |
|                                                   |                    |                                                                                                                                                                                                                          |                                        | Plastic                    | 160                                      |                |         |
|                                                   |                    |                                                                                                                                                                                                                          |                                        | Plastic                    | 310                                      |                |         |
|                                                   |                    |                                                                                                                                                                                                                          |                                        | Plastic + Al               | 340                                      |                |         |
|                                                   |                    |                                                                                                                                                                                                                          |                                        | 60%Pb+40%Sn +alloy+plastic | 1630                                     |                |         |
| USA: Lasalle County Station (1986-1999)           | Ca and mixed       | <sup>6</sup> Li <sub>2</sub> <sup>7</sup> B <sub>4</sub> O <sub>7</sub><br><sup>6</sup> Li <sub>2</sub> <sup>7</sup> B <sub>4</sub> O <sub>7</sub><br>Ca <sub>2</sub> SO <sub>4</sub><br>Ca <sub>2</sub> SO <sub>4</sub> | Panasonic UD-802                       | Mylar                      | 28                                       |                | (56,57) |
|                                                   |                    |                                                                                                                                                                                                                          |                                        | Plastic                    | 310                                      |                |         |
|                                                   |                    |                                                                                                                                                                                                                          |                                        | Plastic                    | 310                                      |                |         |
|                                                   |                    |                                                                                                                                                                                                                          |                                        | Pb                         | 960                                      |                |         |
| USA: Lawrence Livermore National Lab. (1952-1959) | One elem. Sn/Cd/Ag | Film                                                                                                                                                                                                                     | Dupont or Kodak                        | Open, Cd                   |                                          |                |         |
| USA: Lawrence Livermore National Lab. (1959-1964) | Multi Cu-Pb        | Film                                                                                                                                                                                                                     | Dupont 558                             | Open window                | 7                                        |                |         |
|                                                   |                    |                                                                                                                                                                                                                          |                                        | Pb                         | 2200                                     |                |         |
|                                                   |                    |                                                                                                                                                                                                                          |                                        | Cd                         | 1070                                     |                |         |
|                                                   |                    |                                                                                                                                                                                                                          |                                        | Cu                         | 270                                      |                |         |
| USA: Lawrence Livermore National Lab. (1965-1969) | Multi element      | Film                                                                                                                                                                                                                     | Dupont 558                             | Open window                |                                          |                |         |
|                                                   |                    |                                                                                                                                                                                                                          |                                        | Al                         | 275                                      |                |         |
|                                                   |                    |                                                                                                                                                                                                                          |                                        | Cd                         | 439                                      |                |         |
|                                                   |                    |                                                                                                                                                                                                                          |                                        | Pb                         | 1148                                     |                |         |
| USA: Lawrence Livermore National Lab. (1969-1985) | TLD                | Li based TLD                                                                                                                                                                                                             | LLNL Harshaw phosphors                 | Open window                | 32                                       |                |         |
|                                                   |                    |                                                                                                                                                                                                                          |                                        | Plastic                    | 1400                                     |                |         |
| USA: Lawrence Livermore National Lab. (1985-2005) | Ca and mixed       | Li and Ca based TLD                                                                                                                                                                                                      | PANASONIC 810AS and 802AS              | Teflon                     | 19                                       |                |         |
|                                                   |                    |                                                                                                                                                                                                                          |                                        | Plastic                    | 320                                      |                |         |
|                                                   |                    |                                                                                                                                                                                                                          |                                        | Plastic                    | 320                                      |                |         |
|                                                   |                    |                                                                                                                                                                                                                          |                                        | Plastic +Pb                | 1020                                     |                |         |
| USA: Limerick Station (1988-1994)                 | Ca and mixed       | <sup>6</sup> Li <sub>2</sub> <sup>7</sup> B <sub>4</sub> O <sub>7</sub><br><sup>6</sup> Li <sub>2</sub> <sup>7</sup> B <sub>4</sub> O <sub>7</sub><br>Ca <sub>2</sub> SO <sub>4</sub><br>Ca <sub>2</sub> SO <sub>4</sub> | Panasonic UD-802                       | Mylar                      | 14                                       |                | (56,57) |
|                                                   |                    |                                                                                                                                                                                                                          |                                        | Plastic                    | 49                                       |                |         |
|                                                   |                    |                                                                                                                                                                                                                          |                                        | Plastic                    | 350                                      |                |         |
|                                                   |                    |                                                                                                                                                                                                                          |                                        | Pb                         | 1000                                     |                |         |
| USA: Limerick Station (1994-1997)                 | Li other filters   | LiF TLD                                                                                                                                                                                                                  | Eberline TLD-100                       | Mylar                      | 10                                       |                |         |
|                                                   |                    |                                                                                                                                                                                                                          |                                        | Mylar                      | 285                                      |                |         |
| USA: Limerick station (1997-1999)                 | Ca and mixed       | <sup>6</sup> Li <sub>2</sub> <sup>7</sup> B <sub>4</sub> O <sub>7</sub><br><sup>6</sup> Li <sub>2</sub> <sup>7</sup> B <sub>4</sub> O <sub>7</sub><br>Ca <sub>2</sub> SO <sub>4</sub><br>Ca <sub>2</sub> SO <sub>4</sub> | Panasonic UD-802                       | Mylar                      | 14                                       |                | (56,57) |
|                                                   |                    |                                                                                                                                                                                                                          |                                        | Plastic                    | 49                                       |                |         |
|                                                   |                    |                                                                                                                                                                                                                          |                                        | Plastic                    | 350                                      |                |         |
|                                                   |                    |                                                                                                                                                                                                                          |                                        | Pb                         | 1000                                     |                |         |
| USA: Lawrence Berkeley National Lab. (1946-1959)  | One elem. Sn/Cd/Ag | Film                                                                                                                                                                                                                     | Kodak type K (OR 1)<br>Dupont or Kodak | Open, Cd                   | 878                                      |                |         |
| USA: Lawrence Berkeley National Lab. (1959-1964)  | Multi Cu-Pb        | Film                                                                                                                                                                                                                     | Dupont 558                             | Open window                | 7                                        |                |         |
|                                                   |                    |                                                                                                                                                                                                                          |                                        | Pb                         | 2200                                     |                |         |
|                                                   |                    |                                                                                                                                                                                                                          |                                        | Cd                         | 1070                                     |                |         |
|                                                   |                    |                                                                                                                                                                                                                          |                                        | Cu                         | 270                                      |                |         |

Supplementary Information \_ Characteristics of dosimeters used for photon dose estimation

Supplementary Table S1 was completed by health physicists using the best available information; however, expert judgment was also necessary.

| Country: Facility (period)                               | Dosimeter Type   | Dosimeter material  | Commercial type                  | Filters              | Density thickness (mg.cm <sup>-2</sup> ) | Thickness (mm) | Ref |
|----------------------------------------------------------|------------------|---------------------|----------------------------------|----------------------|------------------------------------------|----------------|-----|
| USA: Lawrence Berkeley National Lab. (1965-1981)         | Multi element    | Film                | Dupont 558                       | Open window          |                                          |                |     |
|                                                          |                  |                     |                                  | Al                   | 275                                      |                |     |
|                                                          |                  |                     |                                  | Cd                   | 439                                      |                |     |
|                                                          |                  |                     |                                  | Pb                   | 1148                                     |                |     |
| USA: Lawrence Berkeley National Lab. (1982-1985)         | TLD              | Li based TLD        | LLNL Harshaw phosphors           | Open window          | 32                                       |                |     |
|                                                          |                  |                     |                                  | Plastic              | 1400                                     |                |     |
| USA: Lawrence Berkeley National Lab. (1985-2005)         | Ca and mixed     | Li and Ca based TLD | PANASONIC 810AS and 802AS        | Teflon               | 19                                       |                |     |
|                                                          |                  |                     |                                  | Plastic              | 320                                      |                |     |
|                                                          |                  |                     |                                  | Plastic              | 320                                      |                |     |
|                                                          |                  |                     |                                  | Plastic +Pb          | 1020                                     |                |     |
| USA: Los Alamos National Lab. (1944-1947)                | One elem. Pb     | Film                | Kodak type K                     | Open, Brass          | 985                                      |                |     |
| USA: Los Alamos National Lab. (1947-1950)                | One elem. Pb     | Film                | Kodak type K                     | Open, Brass          | 420                                      |                |     |
| USA: Los Alamos National Lab. (1950-1968)                | Brass + Cd film  | Film                | Dupont 543                       | Open window          |                                          |                |     |
|                                                          |                  |                     |                                  | Brass                | 420                                      |                |     |
|                                                          |                  |                     |                                  | Cd                   | 432                                      |                |     |
| USA: Los Alamos National Lab. (1968-1978)                | Multi-element    | Film                | Dupont 555, Kodak typ.2          | Open window          |                                          |                |     |
|                                                          |                  |                     |                                  | Composite 20         | 445                                      |                |     |
|                                                          |                  |                     |                                  | Composite 21         | 442                                      |                |     |
|                                                          |                  |                     |                                  | Cu                   |                                          |                |     |
| USA: Los Alamos National Lab. (1978-1998)                | Li other filters | Li based TLD        | LASL 7776                        | Plastic              | 90                                       |                |     |
|                                                          |                  |                     |                                  | Cu+plastic           | 340                                      |                |     |
|                                                          |                  |                     |                                  | Cd+plastic           | 550                                      |                |     |
| USA: Los Alamos National Lab. (1998-2005)                | Ca and mixed     | Li and Ca based TLD | LASL 8823<br>2 Harshaw TLD cards | Plastic              | 600                                      |                |     |
|                                                          |                  |                     |                                  | Al+mylar             | 5                                        |                |     |
|                                                          |                  |                     |                                  | Al+mylar             | 10                                       |                |     |
|                                                          |                  |                     |                                  | Plastic              | 600                                      |                |     |
|                                                          |                  |                     |                                  | Plastic              | 185                                      |                |     |
|                                                          |                  |                     |                                  | Plastic              | 185                                      |                |     |
|                                                          |                  |                     |                                  | Plastic+Cd           | 645                                      |                |     |
|                                                          |                  |                     |                                  | Plastic+Cd           | 645                                      |                |     |
| USA: Mare Island Naval Shipyard (1957-1969) <sup>°</sup> |                  |                     | Dupont SX-233                    | Open window          | ~30                                      | 0              |     |
|                                                          |                  |                     |                                  | SS / Cd              | 400 / 865                                | 0.51 / 1       |     |
| USA: Mare Island Naval Shipyard (1969-1974) <sup>°</sup> |                  |                     | Kodak Type 3                     | Open window          | ~30                                      | 0              |     |
|                                                          |                  |                     |                                  | SS / Cd              | 400 / 865                                | 0.51 / 1       |     |
| USA: Mare Island Naval Shipyard (1974-2005) <sup>°</sup> | Ca and mixed     | CaF <sub>2</sub>    | Harshaw bulb style               | Glass enclosed Sn/Pb |                                          |                |     |
| USA: McGuire Station (1981-1992)                         | Ca and mixed     | CaSO <sub>4</sub>   | Teledyne CaSO <sub>4</sub> PB-3  | Open window          | 7                                        |                |     |
|                                                          |                  |                     |                                  | Teflon               | 1000                                     |                |     |
|                                                          |                  |                     |                                  | Cu                   | 1000                                     |                |     |
|                                                          |                  |                     |                                  | Cd                   | 1000                                     |                |     |
| USA: McGuire Station (1993-1999)                         | Li other filters | LiF TLD             | Harshaw 8805 system              | Plastic/Cu           | 333                                      |                |     |
|                                                          |                  |                     |                                  | Plastic/Teflon       | 1000                                     |                |     |
|                                                          |                  |                     |                                  | Mylar                | 17                                       |                |     |
|                                                          |                  |                     |                                  | Plastic              | 300                                      |                |     |

Supplementary Information \_ Characteristics of dosimeters used for photon dose estimation

Supplementary Table S1 was completed by health physicists using the best available information; however, expert judgment was also necessary.

| Country: Facility (period)                                  | Dosimeter Type                  | Dosimeter material  | Commercial type            | Filters              | Density thickness (mg.cm <sup>-2</sup> ) | Thickness (mm) | Ref  |
|-------------------------------------------------------------|---------------------------------|---------------------|----------------------------|----------------------|------------------------------------------|----------------|------|
| USA: Mound (1946-1948)                                      | One elem. Sn/Cd/Ag              | Film                | Kodak type A/MOUND         | Open, Cd (or brass)  | ~1000                                    | 1              |      |
| USA: Mound (1949-1969)                                      | One elem. Sn/Cd/Ag              | Film                | Dupont 552,556/MOUND       | Open, Cd             | ~1000                                    | 1              |      |
| USA: Mound (1970-1977)                                      | Multi element                   | Film                | Kodak type 3/MOUND         | Open window          | <b>103</b>                               |                |      |
|                                                             |                                 |                     |                            | Cd+Ta                | 826                                      |                |      |
|                                                             |                                 |                     |                            | Plastic              | 507                                      |                |      |
|                                                             |                                 |                     |                            | Ta_Plastic           | 1087                                     |                |      |
| USA: Mound (1977-1991)                                      | Li other filters                | Li based TLD        | Harshaw                    | Open window          |                                          |                |      |
|                                                             |                                 |                     |                            | Brass                | 213                                      |                |      |
| USA: Mound (1991-2005)                                      | Li other filters                | Li based TLD        | Harshaw 8801               | Open window/Mylar    | 7                                        |                |      |
|                                                             |                                 |                     |                            | Plastic              | 200                                      |                |      |
|                                                             |                                 |                     |                            | Plastic + Cu         | 93                                       |                |      |
|                                                             |                                 |                     |                            | Teflon               | 980                                      |                |      |
| USA: Naval reactors facility (1975-2005) <sup>°</sup>       | Ca and mixed                    | CaF <sub>2</sub>    | Harshaw bulb style         | Glass enclosed Sn/Pb |                                          |                |      |
| USA: Nevada test site (1950-1953)                           | Brass + Cd film                 | Film                | Dupont 552<br>Dupont 553   | Open window          |                                          |                |      |
|                                                             |                                 |                     |                            | Brass                | 420                                      |                |      |
|                                                             |                                 |                     |                            | Cd                   | 432                                      |                |      |
| USA: Nevada Test Site (1954-1965)                           | One element                     | Pb filter           |                            | Open<br>Pb           | 803                                      |                |      |
| USA: Nevada Test Site (1966-1986)                           | Multi-element                   | Film                | Kodak type 3               | Open window          | <b>103</b>                               |                |      |
|                                                             |                                 |                     |                            | Cd+Ta                | 826                                      |                |      |
|                                                             |                                 |                     |                            | Plastic              | 507                                      |                |      |
|                                                             |                                 |                     |                            | Ta_Plastic           | 1087                                     |                |      |
| USA: Nevada Test Site (1987-2005)                           | Ca and mixed                    | Li and Ca based TLD | Panasonic UD-802           | Teflon               | 14                                       |                |      |
|                                                             |                                 |                     |                            | Plastic              | 68                                       |                |      |
|                                                             |                                 |                     |                            | Plastic              | 160                                      |                |      |
|                                                             |                                 |                     |                            | Plastic +Pb          | 828                                      |                |      |
| USA: New Brunswick (1949-1977)                              | One elem. Sn/Cd/Ag              | Film                | Dupont 552 (ORNL)          | Open, Cd             | 1000                                     | 1              |      |
| USA: New Brunswick (1977-1987)                              | Multi Al-Ag                     | Film                | DuPont 553,558 (INEL/NRTS) | Open window          | 52                                       |                |      |
|                                                             |                                 |                     |                            | Al                   | 175                                      |                |      |
|                                                             |                                 |                     |                            | Ag                   | 203                                      |                |      |
|                                                             |                                 |                     |                            | Cd                   | 950                                      |                |      |
| USA: New Brunswick (1988-2005)                              | Li Al-plastic filter            | Li based TLD        | Panasonic 814AS4           | Al/plastic           | 16+58+600+600                            |                | (56) |
| USA: Newport News Nuclear Shipyard (1950-1952) <sup>°</sup> | One elem. Pb                    | Film                | Kodak Type K               | Open, Pb             | ~30, 58                                  | 0.05           |      |
| USA: Newport News Nuclear Shipyard (1952-1956) <sup>°</sup> | Multi Sn 300mg.cm <sup>-2</sup> | Film                | Eastman, DF-7              | Open window          | ~30                                      | 0              |      |
|                                                             |                                 |                     |                            | SS / Cd              | 400 / 865                                | 0.51 / 1       |      |
| USA: Newport News Nuclear Shipyard (1957-1969) <sup>°</sup> |                                 |                     | Dupont SX-233              | Open window          | ~30                                      | 0              |      |
|                                                             |                                 |                     |                            | SS / Cd              | 400 / 865                                | 0.51 / 1       |      |
| USA: Newport News Nuclear Shipyard (1969-1976) <sup>°</sup> |                                 |                     | Kodak Type 3               | Open window          | ~30                                      | 0              |      |
|                                                             |                                 |                     |                            | SS / Cd              | 400 / 865                                | 0.51 / 1       |      |
| USA: Newport News Nuclear Shipyard (1976-2005) <sup>°</sup> | Li other filters                | Li based TLD        | Three chips                | Open window          |                                          |                |      |
|                                                             |                                 |                     |                            | Cd                   | 330                                      | 0.381          |      |
| USA: Norfolk Naval Shipyard (1970-1974) <sup>°</sup>        |                                 |                     | Kodak Type 3               | Open window          | ~30                                      | 0              |      |
|                                                             |                                 |                     |                            | SS / Cd              | 400 / 865                                | 0.51 / 1       |      |

Supplementary Information \_ Characteristics of dosimeters used for photon dose estimation

Supplementary Table S1 was completed by health physicists using the best available information; however, expert judgment was also necessary.

| Country: Facility (period)                            | Dosimeter Type       | Dosimeter material                                                                                                                                                                             | Commercial type                   | Filters                   | Density thickness (mg.cm <sup>-2</sup> ) | Thickness (mm) | Ref     |
|-------------------------------------------------------|----------------------|------------------------------------------------------------------------------------------------------------------------------------------------------------------------------------------------|-----------------------------------|---------------------------|------------------------------------------|----------------|---------|
| USA: Norfolk Naval Shipyard (1974-2005) <sup>c</sup>  | Ca and mixed         | CaF <sub>2</sub>                                                                                                                                                                               | Harshaw bulb style                | Glass enclosed Sn/Pb      |                                          |                |         |
| USA: North Anna (1978-1993)                           | Ca and mixed         | CaSO <sub>4</sub>                                                                                                                                                                              | Teledyne CaSO <sub>4</sub> PB-3   | Open window               | 7                                        |                |         |
|                                                       |                      |                                                                                                                                                                                                |                                   | Teflon                    | 500                                      |                |         |
|                                                       |                      |                                                                                                                                                                                                |                                   | Cu                        | 1000                                     |                |         |
|                                                       |                      |                                                                                                                                                                                                |                                   | Cd                        | 1000                                     |                |         |
| USA: North Anna (1993-1995)                           | Ca and mixed         | <sup>6</sup> Li <sup>7</sup> B <sub>4</sub> O <sub>7</sub><br><sup>6</sup> Li <sup>7</sup> B <sub>4</sub> O <sub>7</sub><br>Ca <sub>2</sub> SO <sub>4</sub><br>Ca <sub>2</sub> SO <sub>4</sub> | Panasonic UD-802 model 879 holder | Mylar                     | 17                                       |                | (56,57) |
|                                                       |                      |                                                                                                                                                                                                |                                   | Plastic                   | 78                                       |                |         |
|                                                       |                      |                                                                                                                                                                                                |                                   | Plastic                   | 310                                      |                |         |
|                                                       |                      |                                                                                                                                                                                                |                                   | Pb                        | 990                                      |                |         |
|                                                       |                      |                                                                                                                                                                                                |                                   |                           |                                          |                |         |
| USA: North Anna (1996-1997)                           | Ca and mixed         | <sup>6</sup> Li <sup>7</sup> B <sub>4</sub> O <sub>7</sub><br><sup>6</sup> Li <sup>7</sup> B <sub>4</sub> O <sub>7</sub><br>Ca <sub>2</sub> SO <sub>4</sub><br>Ca <sub>2</sub> SO <sub>4</sub> | Panasonic UD-802 model 874 holder | Mylar                     | 17                                       |                | (56,57) |
|                                                       |                      |                                                                                                                                                                                                |                                   | Plastic                   | 310                                      |                |         |
|                                                       |                      |                                                                                                                                                                                                |                                   | Plastic                   | 310                                      |                |         |
|                                                       |                      |                                                                                                                                                                                                |                                   | Pb                        | 990                                      |                |         |
|                                                       |                      |                                                                                                                                                                                                |                                   |                           |                                          |                |         |
| USA: North Anna (1997-1999)                           | Ca and mixed         | <sup>6</sup> Li <sup>7</sup> B <sub>4</sub> O <sub>7</sub><br><sup>6</sup> Li <sup>7</sup> B <sub>4</sub> O <sub>7</sub><br>Ca <sub>2</sub> SO <sub>4</sub><br>Ca <sub>2</sub> SO <sub>4</sub> | Panasonic UD-802 model 879 holder | Mylar                     | 17                                       |                | (56,57) |
|                                                       |                      |                                                                                                                                                                                                |                                   | Plastic                   | 78                                       |                |         |
|                                                       |                      |                                                                                                                                                                                                |                                   | Plastic                   | 310                                      |                |         |
|                                                       |                      |                                                                                                                                                                                                |                                   | Pb                        | 990                                      |                |         |
|                                                       |                      |                                                                                                                                                                                                |                                   |                           |                                          |                |         |
| USA: Oak Ridge National Lab. (1943-1943) <sup>d</sup> | Uncommon (PIC)       | Pocket Ionisation chamber                                                                                                                                                                      | Victoreen Pocket meter, 352       | Al or polystyrene (walls) |                                          | 2.5            |         |
| USA: Oak Ridge National Lab. (1944-1952) <sup>d</sup> | One elem. Sn/Cd/Ag   | Film                                                                                                                                                                                           | Kodak/Dupont type 552             | Open, Cd                  | ~1000                                    | 1              |         |
| USA: Oak Ridge National Lab. (1953-1957) <sup>d</sup> | Multi Cu-Pb          | Film                                                                                                                                                                                           | Kodak type 552                    | Open window               | ~1000                                    |                |         |
|                                                       |                      |                                                                                                                                                                                                |                                   | Pb                        |                                          |                |         |
|                                                       |                      |                                                                                                                                                                                                |                                   | Cd                        |                                          |                |         |
|                                                       |                      |                                                                                                                                                                                                |                                   | Cu                        |                                          |                |         |
|                                                       |                      |                                                                                                                                                                                                |                                   | plastic                   |                                          |                |         |
| USA: Oak Ridge National Lab. (1958-1979) <sup>d</sup> | Multi Al-Ag          | Film                                                                                                                                                                                           | Kodak type 552                    | Open                      | ~1000                                    |                |         |
|                                                       |                      |                                                                                                                                                                                                |                                   | Al                        |                                          |                |         |
|                                                       |                      |                                                                                                                                                                                                |                                   | Cd                        |                                          |                |         |
|                                                       |                      |                                                                                                                                                                                                |                                   | plastic                   |                                          |                |         |
|                                                       |                      |                                                                                                                                                                                                |                                   |                           |                                          |                |         |
| USA: Oak Ridge National Lab. (1980-1988) <sup>d</sup> | Li Al-plastic filter | Li based TLD                                                                                                                                                                                   | Two chips                         | Open, plastic             |                                          |                |         |
| USA: Oak Ridge National Lab. (1989-1997) <sup>d</sup> | Li other filters     | Li based TLD                                                                                                                                                                                   | Harshaw 8805                      | Al                        | 430                                      |                |         |
|                                                       |                      |                                                                                                                                                                                                |                                   | Open window               |                                          |                | (61)    |
|                                                       |                      |                                                                                                                                                                                                |                                   | Plastic                   | 300                                      |                |         |
|                                                       |                      |                                                                                                                                                                                                |                                   | Cu                        | 242                                      |                |         |
|                                                       |                      |                                                                                                                                                                                                |                                   | Teflon                    | ~1000                                    |                |         |
| USA: Oak Ridge, K25 (1945-1953)                       | One elem. Sn/Cd/Ag   | Film                                                                                                                                                                                           | Dupont 552                        | Open, Cd                  | ~1000                                    | 1              |         |
| USA: Oak Ridge, K25 (1954-1979)                       | Multi Cu-Pb          | Film                                                                                                                                                                                           | ORNL-Dupont 552                   | Open window               |                                          |                |         |
|                                                       |                      |                                                                                                                                                                                                |                                   | Pb                        | ~1000                                    |                |         |

<sup>d</sup> i) U.S. facilities prior to the mid to late 1950s used film badges with a single filter. Penetrating radiation was determined from the optical density beneath the filter. Filters were usually Cd, Ag, or Pb filter with a density thickness of around 1000 mg/cm<sup>2</sup>. Oak Ridge National Laboratory (ORNL) badge was chosen as the default dosimeter when unknown.

ii) The ORNL dosimeter designs were the most copied throughout the Atomic Energy Commission and in commercial settings. When in doubt, ORNL dosimeters were considered as default.

Supplementary Information \_ Characteristics of dosimeters used for photon dose estimation

Supplementary Table S1 was completed by health physicists using the best available information; however, expert judgment was also necessary.

| Country: Facility (period)            | Dosimeter Type       | Dosimeter material                                                                                                                                                                                                         | Commercial type                             | Filters                                                                                       | Density thickness (mg.cm <sup>-2</sup> )   | Thickness (mm) | Ref     |
|---------------------------------------|----------------------|----------------------------------------------------------------------------------------------------------------------------------------------------------------------------------------------------------------------------|---------------------------------------------|-----------------------------------------------------------------------------------------------|--------------------------------------------|----------------|---------|
|                                       |                      |                                                                                                                                                                                                                            |                                             | Cd                                                                                            | 150                                        |                |         |
|                                       |                      |                                                                                                                                                                                                                            |                                             | Cu                                                                                            | 300                                        |                |         |
|                                       |                      |                                                                                                                                                                                                                            |                                             | plastic                                                                                       | 7                                          |                |         |
| USA: Oak Ridge, K25 (1980-1987)       | Li Al-plastic filter | Li based TLD                                                                                                                                                                                                               | ORNL/Harshaw                                | Open, plastic                                                                                 |                                            |                |         |
|                                       |                      |                                                                                                                                                                                                                            |                                             | Al                                                                                            | 430                                        |                |         |
| USA: Oak Ridge, K25 (1987-2005)       | Li other filters     | Li based TLD                                                                                                                                                                                                               | Harshaw                                     | Open window                                                                                   |                                            |                |         |
|                                       |                      |                                                                                                                                                                                                                            |                                             | Plastic                                                                                       | 300                                        |                |         |
|                                       |                      |                                                                                                                                                                                                                            |                                             | Plastic + Cu                                                                                  | 242                                        |                |         |
|                                       |                      |                                                                                                                                                                                                                            |                                             | Teflon                                                                                        | 1000                                       |                |         |
| USA: Oak Ridge Y-12 (1950-1960)       | One elem. Sn/Cd/Ag   | Film                                                                                                                                                                                                                       | Dupont 552                                  | Open, Cd                                                                                      | ~1000                                      | 1              |         |
| USA: Oak Ridge Y-12 (1961-1979)       | Multi Cu-Pb          | Film                                                                                                                                                                                                                       | Dupont 552                                  | Open window                                                                                   |                                            |                |         |
|                                       |                      |                                                                                                                                                                                                                            |                                             | Pb                                                                                            | ~1000                                      |                |         |
|                                       |                      |                                                                                                                                                                                                                            |                                             | Cd                                                                                            | 150                                        |                |         |
|                                       |                      |                                                                                                                                                                                                                            |                                             | Cu                                                                                            | 300                                        |                |         |
|                                       |                      |                                                                                                                                                                                                                            |                                             | plastic                                                                                       | 7                                          |                |         |
| USA: Oak Ridge Y-12 (1980-1988)       | Li Al-plastic filter | Li based TLD                                                                                                                                                                                                               | ORNL/Harshaw                                | Open, plastic                                                                                 |                                            |                |         |
| USA: Oak Ridge Y-12 (1989-2005)       | Li other filters     | Li based TLD                                                                                                                                                                                                               | Harshaw                                     | Open window                                                                                   |                                            |                |         |
|                                       |                      |                                                                                                                                                                                                                            |                                             | Plastic                                                                                       | 300                                        |                |         |
|                                       |                      |                                                                                                                                                                                                                            |                                             | Plastic + Cu                                                                                  | 242                                        |                |         |
|                                       |                      |                                                                                                                                                                                                                            |                                             | Teflon                                                                                        | 1000                                       |                |         |
| USA: Oconee Station (1974-1978)       | LiF TLD              | Eberline                                                                                                                                                                                                                   | Mylar<br>Mylar / Plastic<br>Mylar / Plastic | 10<br>285<br>285                                                                              |                                            |                |         |
| USA: Oconee Station (1978-1992)       | Ca and mixed         | CaSO <sub>4</sub>                                                                                                                                                                                                          | Teledyne CaSO <sub>4</sub> PB-3             | Open window<br>Teflon<br>Cu<br>Cd                                                             | 7<br>1000<br>1000<br>1000                  |                |         |
| USA: Oconee Station (1993-1999)       | Li other filters     | LiF TLD                                                                                                                                                                                                                    | Harshaw 8805 system                         | Plastic/Cu<br>Plastic/Teflon<br>Mylar<br>Plastic                                              | 333<br>1000<br>17<br>300                   |                |         |
| USA: Oyster Creek Station (1968-1973) | Multi Cu-Pb          | Film                                                                                                                                                                                                                       | Landauer Film type G                        | Open window<br>Plastic<br>Plastic<br>Plastic<br>Plastic + Al<br>60%Pb+40%Sn<br>+alloy+plastic | 7<br>160<br>310<br>340<br>1630             |                |         |
| USA: Oyster Creek Station (1974-1983) | Li other filters     | LiF TLD                                                                                                                                                                                                                    | Teledyne Model PB-5                         | Teflon/Plastic<br>Teflon/Plastic<br>Teflon/Plastic/Al/Cu<br>Teflon/Plastic/Al/Cu/Pb           | 4<br>173<br>173+210+917<br>173+210+117+725 |                |         |
| USA: Oyster Creek Station (1984-1999) | Ca and mixed         | <sup>6</sup> Li <sub>2</sub> <sup>10</sup> B <sub>4</sub> O <sub>7</sub><br><sup>6</sup> Li <sub>2</sub> <sup>10</sup> B <sub>4</sub> O <sub>7</sub><br>Ca <sub>2</sub> SO <sub>4</sub><br>Ca <sub>2</sub> SO <sub>4</sub> | Panasonic UD-802 ISA<br>model 830           | Mylar<br>Plastic<br>Plastic<br>Pb                                                             | 14<br>75<br>350<br>1000                    |                | (56,57) |

Supplementary Information \_ Characteristics of dosimeters used for photon dose estimation

Supplementary Table S1 was completed by health physicists using the best available information; however, expert judgment was also necessary.

| Country: Facility (period)                                         | Dosimeter Type      | Dosimeter material                                                                                                                                                                                                         | Commercial type          | Filters           | Density thickness (mg.cm <sup>-2</sup> ) | Thickness (mm) | Ref     |
|--------------------------------------------------------------------|---------------------|----------------------------------------------------------------------------------------------------------------------------------------------------------------------------------------------------------------------------|--------------------------|-------------------|------------------------------------------|----------------|---------|
| USA: Paducah Gaseous Diffusion Plant (1954-1980)                   | One elem. Sn/Cd/Ag  | Film                                                                                                                                                                                                                       | Kodak type 2 (ORNL)      | Open, Cd          | ~1000                                    | 1              |         |
| USA: Paducah Gaseous Diffusion Plant (1981)                        | Missing information |                                                                                                                                                                                                                            |                          |                   |                                          |                |         |
| USA: Paducah Gaseous Diffusion Plant (1982-1998)                   | Li other filters    | LiF TLD                                                                                                                                                                                                                    | Harshaw 2276, 8801       | Al                | 300                                      |                |         |
|                                                                    |                     |                                                                                                                                                                                                                            |                          | Cd/Au             | 1000                                     |                |         |
|                                                                    |                     |                                                                                                                                                                                                                            |                          | Mylar             | 10                                       |                |         |
|                                                                    |                     |                                                                                                                                                                                                                            |                          | Plastic           | 300                                      |                |         |
| USA: Paducah Gaseous Diffusion Plant (1999-2005)                   | Ca and mixed        | Li and Ca based TLD                                                                                                                                                                                                        | Panasonic UD-802         | Mylar             | 14                                       |                | (56,57) |
|                                                                    |                     |                                                                                                                                                                                                                            |                          | Plastic+mylar     | 320                                      |                |         |
|                                                                    |                     |                                                                                                                                                                                                                            |                          | Plastic+mylar     | 320                                      |                |         |
|                                                                    |                     |                                                                                                                                                                                                                            |                          | Pb                | 1020                                     | 0.7            |         |
| USA: Paducah Gaseous Diffusion Plant (1999-2005)<br>USEC employees | Li other filters    | Li based TLD                                                                                                                                                                                                               | Harshaw (ICN TLD 760)    | Open window/Mylar | 7                                        |                |         |
|                                                                    |                     |                                                                                                                                                                                                                            |                          | Plastic           | 600                                      |                |         |
|                                                                    |                     |                                                                                                                                                                                                                            |                          | Plastic + Cu      | 242                                      |                |         |
|                                                                    |                     |                                                                                                                                                                                                                            |                          | Plastic           | 600                                      |                |         |
| USA: Palo Verde Station (1983-1999)                                |                     | <sup>7</sup> Li <sub>2</sub> <sup>11</sup> B <sub>4</sub> O <sub>7</sub><br><sup>7</sup> Li <sub>2</sub> <sup>11</sup> B <sub>4</sub> O <sub>7</sub><br>Ca <sub>2</sub> SO <sub>4</sub><br>Ca <sub>2</sub> SO <sub>4</sub> | Panasonic UD-812         | Mylar             | 14                                       |                | (56,57) |
|                                                                    |                     |                                                                                                                                                                                                                            |                          | Plastic           | 320                                      |                |         |
|                                                                    |                     |                                                                                                                                                                                                                            |                          | Plastic           | 320                                      |                |         |
|                                                                    |                     |                                                                                                                                                                                                                            |                          | Pb                | 960                                      |                |         |
|                                                                    |                     |                                                                                                                                                                                                                            |                          |                   |                                          |                |         |
| USA: Pantex (1952-1963)                                            | One elem. Sn/Cd/Ag  | Film                                                                                                                                                                                                                       | Kodak type 2 (tracerlab) | Open, Cd          | ~1000                                    | 1              |         |
| USA: Pantex (1964-1965)                                            | Missing info        | Film                                                                                                                                                                                                                       | Eberline                 | Al                |                                          |                |         |
| USA: Pantex (1966-1972)                                            | One elem. Sn/Cd/Ag  | Film                                                                                                                                                                                                                       | Landauer                 | Open, Cd          | ~1000                                    | 1              |         |
| USA: Pantex (1973-1976)                                            | Li Al filter        | Li based TLD                                                                                                                                                                                                               | Pantex/Landauer          | Mylar             | 10                                       |                |         |
|                                                                    |                     |                                                                                                                                                                                                                            |                          | Al                | 290                                      |                |         |
| USA: Pantex (1977-1980)                                            | Li Al filters       | Li based TLD                                                                                                                                                                                                               | Pantex                   | Cd covered        | 7                                        |                |         |
|                                                                    |                     |                                                                                                                                                                                                                            |                          | Cd backed         |                                          |                |         |
|                                                                    |                     |                                                                                                                                                                                                                            |                          | Cd covered        |                                          |                |         |
|                                                                    |                     |                                                                                                                                                                                                                            |                          | Al                |                                          |                |         |
|                                                                    |                     |                                                                                                                                                                                                                            |                          | Cd backed         |                                          |                |         |
| USA: Pantex (1980-1993)                                            | Ca and mixed        | Li and Ca based TLD                                                                                                                                                                                                        | Panasonic UD-802         | Mylar             | 20                                       |                | (56,57) |
|                                                                    |                     |                                                                                                                                                                                                                            |                          | Plastic+mylar     | 300                                      |                |         |
|                                                                    |                     |                                                                                                                                                                                                                            |                          | Plastic+mylar     | 300                                      |                |         |
|                                                                    |                     |                                                                                                                                                                                                                            |                          | Pb                | 1000                                     |                |         |
| USA: Pantex (1994-2005)                                            | Ca and mixed        | Li and Ca based TLD                                                                                                                                                                                                        | Panasonic UD-812         | Mylar             | 17                                       |                | (56,57) |
|                                                                    |                     |                                                                                                                                                                                                                            |                          | Plastic+mylar     | 150                                      |                |         |
|                                                                    |                     |                                                                                                                                                                                                                            |                          | Plastic+mylar     | 300                                      |                |         |
|                                                                    |                     |                                                                                                                                                                                                                            |                          | Pb                | 1000                                     |                |         |
| USA: Peach Bottom (1974-1988)                                      | Li other filters    | LiF TLD                                                                                                                                                                                                                    | Eberline TLD-100         | Mylar             | 10                                       |                |         |
|                                                                    |                     |                                                                                                                                                                                                                            |                          | Mylar             | 285                                      |                |         |
| USA: Peach Bottom (1988-1994)                                      | Ca and mixed        | <sup>n</sup> Li <sub>2</sub> <sup>n</sup> B <sub>4</sub> O <sub>7</sub><br><sup>n</sup> Li <sub>2</sub> <sup>n</sup> B <sub>4</sub> O <sub>7</sub><br>Ca <sub>2</sub> SO <sub>4</sub><br>Ca <sub>2</sub> SO <sub>4</sub>   | Panasonic UD-802         | Mylar             | 14                                       |                | (56,57) |
|                                                                    |                     |                                                                                                                                                                                                                            |                          | Plastic           | 49                                       |                |         |
|                                                                    |                     |                                                                                                                                                                                                                            |                          | Plastic           | 350                                      |                |         |
|                                                                    |                     |                                                                                                                                                                                                                            |                          | Pb                | 1000                                     |                |         |
| USA: Peach Bottom (1994-1997)                                      | Li other filters    | LiF TLD                                                                                                                                                                                                                    | Eberline TLD-100         | Mylar             | 10                                       |                |         |
|                                                                    |                     |                                                                                                                                                                                                                            |                          | Mylar             | 285                                      |                |         |

Supplementary Information \_ Characteristics of dosimeters used for photon dose estimation

Supplementary Table S1 was completed by health physicists using the best available information; however, expert judgment was also necessary.

| Country: Facility (period)                          | Dosimeter Type   | Dosimeter material                                                                                                                                                                                                       | Commercial type                      | Filters         | Density thickness (mg.cm <sup>-2</sup> ) | Thickness (mm) | Ref     |
|-----------------------------------------------------|------------------|--------------------------------------------------------------------------------------------------------------------------------------------------------------------------------------------------------------------------|--------------------------------------|-----------------|------------------------------------------|----------------|---------|
| USA: Peach Bottom (1997-1999)                       | Ca and mixed     | <sup>6</sup> Li <sub>2</sub> <sup>6</sup> B <sub>4</sub> O <sub>7</sub><br><sup>7</sup> Li <sub>2</sub> <sup>6</sup> B <sub>4</sub> O <sub>7</sub><br>Ca <sub>2</sub> SO <sub>4</sub><br>Ca <sub>2</sub> SO <sub>4</sub> | Panasonic UD-802                     | Mylar           | 14                                       |                | (56,57) |
|                                                     |                  |                                                                                                                                                                                                                          |                                      | Plastic         | 49                                       |                |         |
|                                                     |                  |                                                                                                                                                                                                                          |                                      | Plastic         | 350                                      |                |         |
|                                                     |                  |                                                                                                                                                                                                                          |                                      | Pb              | 1000                                     |                |         |
| USA: Pearl Harbor (1963-1969)                       |                  |                                                                                                                                                                                                                          | Dupont SX-233                        | Open window     | ~30                                      | 0              |         |
|                                                     |                  |                                                                                                                                                                                                                          |                                      | SS / Cd         | 400 / 865                                | 0.51 / 1       |         |
| USA: Pearl Harbor (1969-1971)                       |                  |                                                                                                                                                                                                                          | Kodak Type 3                         | Open window     | ~30                                      | 0              |         |
|                                                     |                  |                                                                                                                                                                                                                          |                                      | SS / Cd         | 400 / 865                                | 0.51 / 1       |         |
| USA: Perry Nuclear Station (1982-1985)              | Ca and mixed     | <sup>6</sup> Li <sub>2</sub> <sup>6</sup> B <sub>4</sub> O <sub>7</sub><br><sup>7</sup> Li <sub>2</sub> <sup>6</sup> B <sub>4</sub> O <sub>7</sub><br>Ca <sub>2</sub> SO <sub>4</sub><br>Ca <sub>2</sub> SO <sub>4</sub> | Panasonic UD-802<br>Landauer service | Mylar           | 14                                       |                | (56,57) |
|                                                     |                  |                                                                                                                                                                                                                          |                                      | Plastic         | 350                                      |                |         |
|                                                     |                  |                                                                                                                                                                                                                          |                                      | Plastic         | 350                                      |                |         |
|                                                     |                  |                                                                                                                                                                                                                          |                                      | Pb              | 1000                                     |                |         |
| USA: Perry Nuclear Station (1985-1992)              |                  | LiF TLD                                                                                                                                                                                                                  | Eberline                             | Mylar           | 10                                       |                |         |
|                                                     |                  |                                                                                                                                                                                                                          |                                      | Mylar / Plastic | 285                                      |                |         |
|                                                     |                  |                                                                                                                                                                                                                          |                                      | Mylar / Plastic | 285                                      |                |         |
| USA: Perry Nuclear Station (1992-1999)              | Li other filters | LiF TLD                                                                                                                                                                                                                  | Harshaw 8805 system                  | Plastic/Cu      | 345                                      |                |         |
|                                                     |                  |                                                                                                                                                                                                                          |                                      | Plastic/Teflon  | 1000                                     |                |         |
|                                                     |                  |                                                                                                                                                                                                                          |                                      | Mylar           | 17                                       |                |         |
|                                                     |                  |                                                                                                                                                                                                                          |                                      | Plastic         | 312                                      |                |         |
| USA: Point Beach (1970)                             | Missing info     | Film                                                                                                                                                                                                                     | Eberline                             | Al and Cd       | ?                                        |                |         |
| USA: Point Beach (1970-1981)                        |                  | LiF TLD                                                                                                                                                                                                                  | Eberline                             | Mylar           | 10                                       |                |         |
|                                                     |                  |                                                                                                                                                                                                                          |                                      | Mylar / Plastic | 285                                      |                |         |
|                                                     |                  |                                                                                                                                                                                                                          |                                      | Mylar / Plastic | 285                                      |                |         |
| USA: Point Beach (1981-1988)                        | Li other filters | LiF TLD                                                                                                                                                                                                                  | Landauer TLD-100-T1                  | ?               |                                          |                |         |
| USA: Point Beach (1988-1995)                        | Li other filters | LiF TLD                                                                                                                                                                                                                  | Landauer-Alnor TLD-100-K1            | Mylar           | 7                                        |                |         |
|                                                     |                  |                                                                                                                                                                                                                          |                                      | Mylar/Plastic   | 70                                       |                |         |
|                                                     |                  |                                                                                                                                                                                                                          |                                      | Sn/Al/Plastic   | 495                                      |                |         |
|                                                     |                  |                                                                                                                                                                                                                          |                                      | Al/Plastic      | 275                                      |                |         |
| USA: Point Beach (1995-1998)                        | Li other filters | LiF TLD                                                                                                                                                                                                                  | Landauer TLD-700-M1                  | ?               |                                          |                |         |
| USA: Point Beach (1999-2000)                        | Li other filters | LiF TLD                                                                                                                                                                                                                  | Harshaw 8805 system                  | Plastic/Cu      | 345                                      |                |         |
|                                                     |                  |                                                                                                                                                                                                                          |                                      | Plastic/Teflon  | 1000                                     |                |         |
|                                                     |                  |                                                                                                                                                                                                                          |                                      | Mylar           | 17                                       |                |         |
|                                                     |                  |                                                                                                                                                                                                                          |                                      | Plastic         | 312                                      |                |         |
| USA: Portsmouth Gaseous Diffusion Plant (1954-1980) | Missing info     | Film                                                                                                                                                                                                                     |                                      | Open window     |                                          |                |         |
|                                                     |                  |                                                                                                                                                                                                                          |                                      | Au              |                                          |                |         |
|                                                     |                  |                                                                                                                                                                                                                          |                                      | Cd              |                                          |                |         |
| USA: Portsmouth Gaseous Diffusion Plant (1981-1999) | Li other filters | LiF TLD                                                                                                                                                                                                                  | Harshaw 2276, 8801                   | Al              | 436                                      |                |         |
|                                                     |                  |                                                                                                                                                                                                                          |                                      | Cd/Au           | 1177                                     |                |         |
|                                                     |                  |                                                                                                                                                                                                                          |                                      | Mylar           | 16                                       |                |         |
|                                                     |                  |                                                                                                                                                                                                                          |                                      | Plastic         | 167                                      |                |         |
| USA: Portsmouth Gaseous Diffusion Plant (1999-2005) | Ca and mixed     | Li and Ca based TLD                                                                                                                                                                                                      | Panasonic UD-802                     | Mylar           | 14                                       |                | (56,57) |
|                                                     |                  |                                                                                                                                                                                                                          |                                      | Plastic+mylar   | 320                                      |                |         |
|                                                     |                  |                                                                                                                                                                                                                          |                                      | Plastic+mylar   | 320                                      |                |         |
|                                                     |                  |                                                                                                                                                                                                                          |                                      | Pb              | 1020                                     | 0.7            |         |

Supplementary Information \_ Characteristics of dosimeters used for photon dose estimation

Supplementary Table S1 was completed by health physicists using the best available information; however, expert judgment was also necessary.

| Country: Facility (period)                                         | Dosimeter Type                     | Dosimeter material                                                                                                                                                                                                       | Commercial type                   | Filters                       | Density thickness (mg.cm <sup>-2</sup> ) | Thickness (mm) | Ref     |
|--------------------------------------------------------------------|------------------------------------|--------------------------------------------------------------------------------------------------------------------------------------------------------------------------------------------------------------------------|-----------------------------------|-------------------------------|------------------------------------------|----------------|---------|
| USA: Portsmouth Gaseous Diffusion Plant (1999-2005) USEC Employees | Li other filters                   | Li based TLD                                                                                                                                                                                                             | Harshaw (ICN TLD 760)             | Open window/Mylar             | 7                                        |                |         |
|                                                                    |                                    |                                                                                                                                                                                                                          |                                   | Plastic                       | 600                                      |                |         |
|                                                                    |                                    |                                                                                                                                                                                                                          |                                   | Plastic + Cu                  | 242                                      |                |         |
|                                                                    |                                    |                                                                                                                                                                                                                          |                                   | Plastic                       | 600                                      |                |         |
| USA: Portsmouth Naval Shipyard (1950-1952) <sup>c</sup>            | One elem. Pb                       | Film                                                                                                                                                                                                                     | Kodak Type K                      | Open, Pb                      | ~30, 58                                  | 0.05           |         |
| USA: Portsmouth Naval Shipyard (1952-1956) <sup>c</sup>            | Multi<br>Sn 300mg.cm <sup>-2</sup> | Film                                                                                                                                                                                                                     | Eastman, DF-7                     | Open window                   | ~30                                      | 0              |         |
|                                                                    |                                    |                                                                                                                                                                                                                          |                                   | SS / Cd                       | 400 / 865                                | 0.51 / 1       |         |
| USA: Portsmouth Naval Shipyard (1957-1969) <sup>c</sup>            |                                    |                                                                                                                                                                                                                          | Dupont SX-233                     | Open window                   | ~30                                      | 0              |         |
|                                                                    |                                    |                                                                                                                                                                                                                          |                                   | SS / Cd                       | 400 / 865                                | 0.51 / 1       |         |
| USA: Portsmouth Naval Shipyard (1969-1974) <sup>c</sup>            |                                    |                                                                                                                                                                                                                          | Kodak Type 3                      | Open window                   | ~30                                      | 0              |         |
|                                                                    |                                    |                                                                                                                                                                                                                          |                                   | SS / Cd                       | 400 / 865                                | 0.51 / 1       |         |
| USA: Portsmouth Naval Shipyard (1974-2005) <sup>c</sup>            | Ca and mixed                       | CaF <sub>2</sub>                                                                                                                                                                                                         | Harshaw bulb style                | Glass enclosed Sn/Pb          |                                          |                |         |
| USA: Pugen Sound (1966-1969) <sup>c</sup>                          |                                    |                                                                                                                                                                                                                          | Dupont SX-233                     | Open window                   | ~30                                      | 0              |         |
|                                                                    |                                    |                                                                                                                                                                                                                          |                                   | SS / Cd                       | 400 / 865                                | 0.51 / 1       |         |
| USA: Pugen Sound (1969-1974) <sup>c</sup>                          |                                    |                                                                                                                                                                                                                          | Kodak Type 3                      | Open window                   | ~30                                      | 0              |         |
|                                                                    |                                    |                                                                                                                                                                                                                          |                                   | SS / Cd                       | 400 / 865                                | 0.51 / 1       |         |
| USA: Pugen Sound (1974-2005) <sup>c</sup>                          | Ca and mixed                       | CaF <sub>2</sub>                                                                                                                                                                                                         | Harshaw bulb style                | Glass enclosed Sn/Pb          |                                          |                |         |
| USA: Quad Cities Station (1970-1985)                               | Multi Cu-Pb                        | Film                                                                                                                                                                                                                     | Landauer Film type G              | Open window                   |                                          |                |         |
|                                                                    |                                    |                                                                                                                                                                                                                          |                                   | Plastic                       | 7                                        |                |         |
|                                                                    |                                    |                                                                                                                                                                                                                          |                                   | Plastic                       | 160                                      |                |         |
|                                                                    |                                    |                                                                                                                                                                                                                          |                                   | Plastic                       | 310                                      |                |         |
|                                                                    |                                    |                                                                                                                                                                                                                          |                                   | Plastic + Al                  | 340                                      |                |         |
|                                                                    |                                    |                                                                                                                                                                                                                          |                                   | 60%Pb+40%Sn<br>+alloy+plastic | 1630                                     |                |         |
| USA: Quad Cities Station (1985-1999)                               | Ca and mixed                       | <sup>6</sup> Li <sub>2</sub> <sup>6</sup> B <sub>4</sub> O <sub>7</sub><br><sup>7</sup> Li <sub>2</sub> <sup>6</sup> B <sub>4</sub> O <sub>7</sub><br>Ca <sub>2</sub> SO <sub>4</sub><br>Ca <sub>2</sub> SO <sub>4</sub> | Panasonic UD-802                  | Mylar                         | 28                                       |                | (56,57) |
|                                                                    |                                    |                                                                                                                                                                                                                          |                                   | Plastic                       | 310                                      |                |         |
|                                                                    |                                    |                                                                                                                                                                                                                          |                                   | Plastic                       | 310                                      |                |         |
|                                                                    |                                    |                                                                                                                                                                                                                          |                                   | Pb                            | 960                                      |                |         |
| USA: Rocketdyne (1954-1962)                                        | Missing info                       | Film                                                                                                                                                                                                                     | Kodak Type k<br>Dupont 552 (1956) | Open window                   |                                          |                |         |
|                                                                    |                                    |                                                                                                                                                                                                                          |                                   | Brass<br>Pb                   |                                          |                |         |
| USA: Rocketdyne (1963-1993)                                        | Multi Cu-Pb                        | Film                                                                                                                                                                                                                     | Dupont<br>Kodak type 2 (1968)     | Open window                   |                                          |                |         |
|                                                                    |                                    |                                                                                                                                                                                                                          |                                   | Pb/Tn                         | 1660                                     |                |         |
|                                                                    |                                    |                                                                                                                                                                                                                          |                                   | Cd                            |                                          |                |         |
|                                                                    |                                    |                                                                                                                                                                                                                          |                                   | Al                            | 540                                      |                |         |
| USA: Rocketdyne (1994-2005)                                        | Li other filters                   | Li based TLD                                                                                                                                                                                                             | Harshaw (Landauer)                | Open window/Mylar             | 17                                       |                |         |
|                                                                    |                                    |                                                                                                                                                                                                                          |                                   | Plastic                       | 600                                      |                |         |
|                                                                    |                                    |                                                                                                                                                                                                                          |                                   | Plastic + Cu                  | 242                                      |                |         |
|                                                                    |                                    |                                                                                                                                                                                                                          |                                   | Plastic+ Teflon               | 600                                      |                |         |
| USA: Rocky Flats Golden Co (1951-1963)                             | One elem. Sn/Cd/Ag                 | Film                                                                                                                                                                                                                     | Dupont 552                        | Open, Cd                      | ~1000                                    | 1              |         |
| USA: Rocky Flats Golden Co (1964-1969)                             | Multi-element                      | Film                                                                                                                                                                                                                     | Dupont 558                        | Open window                   |                                          |                |         |
|                                                                    |                                    |                                                                                                                                                                                                                          |                                   | Cd                            | 878                                      |                |         |
|                                                                    |                                    |                                                                                                                                                                                                                          |                                   | Be                            | 470                                      |                |         |
|                                                                    |                                    |                                                                                                                                                                                                                          |                                   | Cu                            | 114                                      |                |         |



Supplementary Information \_ Characteristics of dosimeters used for photon dose estimation

Supplementary Table S1 was completed by health physicists using the best available information; however, expert judgment was also necessary.

| Country: Facility (period)                                       | Dosimeter Type     | Dosimeter material                                                                                                                                                                                                         | Commercial type                          | Filters                                                                                                 | Density thickness (mg.cm <sup>-2</sup> )             | Thickness (mm) | Ref     |
|------------------------------------------------------------------|--------------------|----------------------------------------------------------------------------------------------------------------------------------------------------------------------------------------------------------------------------|------------------------------------------|---------------------------------------------------------------------------------------------------------|------------------------------------------------------|----------------|---------|
| USA: Rocky Flats Golden Co (1969-1979)                           | Li other filters   | Li based TLD                                                                                                                                                                                                               |                                          | Open window<br>plastic<br>Brass                                                                         |                                                      |                |         |
| USA: Rocky Flats Golden Co (1971-1982)                           | Li other filters   | Li based TLD                                                                                                                                                                                                               | Harshaw                                  | Open window<br>Plastic<br>Plastic + Cu<br>Teflon                                                        | 300<br>242<br>1000                                   |                |         |
| USA: Rocky Flats Golden Co (1983-2005)<br>2 dosimeters<br><br>or | Ca and mixed       | Li and Ca based TLD                                                                                                                                                                                                        | Panasonic UD-802<br><br>Panasonic UD-809 | Teflon<br>Plastic<br>Plastic<br>Plastic+ Pb<br>Plastic+ Cd<br>Plastic+ Sn<br>Plastic+ Cd<br>Plastic+ Cd | 36<br>390<br>490<br>1160<br>930<br>840<br>930<br>930 |                | (56,57) |
| USA: Sandia (1949-1958)                                          | One elem. Sn/Cd/Ag | Film                                                                                                                                                                                                                       | Kodak type A/MOUND                       | Open, Brass                                                                                             | 213                                                  |                |         |
| USA: Sandia (1959-1971)                                          | Multi element      | Film                                                                                                                                                                                                                       | Dupont 558/MOUND                         | Open window<br>Al<br>Sn+Cd<br>Sn                                                                        | 1000                                                 |                |         |
| USA: Sandia (1971-1988)                                          | Li Al filter       | Li based TLD                                                                                                                                                                                                               | Harshaw TLD-100                          |                                                                                                         | 30<br>280                                            |                |         |
| USA: Sandia (1989-2005)                                          | Li other filters   | Li based TLD                                                                                                                                                                                                               | Harshaw 8801<br>8802 (95-2005)           | Open window/Mylar<br>Plastic<br>Plastic + Cu<br>Plastic                                                 | 7<br>600<br>242<br>600                               |                |         |
| USA: San Onofre (1966-1967)                                      | Missing info       | Film                                                                                                                                                                                                                       | Technical Associates                     | ?                                                                                                       |                                                      |                |         |
| USA: San Onofre (1967-1984)                                      | Multi Cu-Pb        | Film                                                                                                                                                                                                                       | Landauer Film type G                     | Open window<br>Plastic<br>Plastic<br>Plastic<br>Plastic + Al<br>60%Pb+40%Sn<br>+alloy+plastic           | 7<br>160<br>310<br>340<br>1630                       |                |         |
| USA: San Onofre (1984-1999)                                      | Ca and mixed       | <sup>6</sup> Li <sub>2</sub> <sup>10</sup> B <sub>4</sub> O <sub>7</sub><br><sup>6</sup> Li <sub>2</sub> <sup>10</sup> B <sub>4</sub> O <sub>7</sub><br>Ca <sub>2</sub> SO <sub>4</sub><br>Ca <sub>2</sub> SO <sub>4</sub> | Panasonic UD-802                         | Mylar<br>Plastic<br>Plastic<br>Pb                                                                       | 14<br>49<br>350<br>1000                              |                | (56,57) |
| USA: Savannah River (1951-1958)                                  | One elem. Sn/Cd/Ag | Film                                                                                                                                                                                                                       | Kodak/Dupont type 552                    | Open, Cd                                                                                                | ~1000                                                | 1              |         |
| USA: Savannah River (1958-1970)                                  | Multi Al-Ag        | Film                                                                                                                                                                                                                       | DuPont type 552                          | Open window<br>Al<br>Ag                                                                                 | 540<br>1050                                          | 2<br>1         |         |
| USA: Savannah River (1970-1982)                                  | Li Al filter       | Li based TLD                                                                                                                                                                                                               | Harshaw                                  | Open window<br>Al                                                                                       | 540                                                  | 2              |         |
| USA: Savannah River (1982-1997)                                  | Ca and mixed       | Li and Ca based TLD                                                                                                                                                                                                        | Panasonic UD-802                         | Mylar<br>Plastic+mylar                                                                                  | 14<br>320                                            |                | (56,57) |

Supplementary Information \_ Characteristics of dosimeters used for photon dose estimation

Supplementary Table S1 was completed by health physicists using the best available information; however, expert judgment was also necessary.

| Country: Facility (period)            | Dosimeter Type   | Dosimeter material                                                                                                                                                                                                         | Commercial type                       | Filters                    | Density thickness (mg.cm <sup>-2</sup> ) | Thickness (mm) | Ref     |
|---------------------------------------|------------------|----------------------------------------------------------------------------------------------------------------------------------------------------------------------------------------------------------------------------|---------------------------------------|----------------------------|------------------------------------------|----------------|---------|
|                                       |                  |                                                                                                                                                                                                                            |                                       | Plastic+mylar              | 320                                      |                |         |
|                                       |                  |                                                                                                                                                                                                                            |                                       | Pb                         | 1020                                     | 0.7            |         |
| USA: St Lucie (1976-1985)             | Li Al filter     | Li based TLD                                                                                                                                                                                                               | Harshaw TLD-100                       |                            | 30                                       |                |         |
|                                       |                  |                                                                                                                                                                                                                            |                                       | Al                         | 280                                      |                |         |
| USA: St Lucie (1985-1991)             | Li other filters | LIF TLD                                                                                                                                                                                                                    | Harshaw 8805 system                   | Plastic/Cu                 | 345                                      |                |         |
|                                       |                  |                                                                                                                                                                                                                            |                                       | Plastic/Teflon             | 1000                                     |                |         |
|                                       |                  |                                                                                                                                                                                                                            |                                       | Mylar                      | 17                                       |                |         |
|                                       |                  |                                                                                                                                                                                                                            |                                       | Plastic                    | 312                                      |                |         |
| USA: St Lucie (1991-1999)             | Ca and mixed     | <sup>7</sup> Li <sub>2</sub> <sup>11</sup> B <sub>4</sub> O <sub>7</sub><br><sup>7</sup> Li <sub>2</sub> <sup>11</sup> B <sub>4</sub> O <sub>7</sub><br>Ca <sub>2</sub> SO <sub>4</sub><br>Ca <sub>2</sub> SO <sub>4</sub> | Panasonic UD-802 ISA model 820 Holder | Mylar                      | 19                                       |                | (56,57) |
|                                       |                  |                                                                                                                                                                                                                            |                                       | Plastic                    | 345                                      |                |         |
|                                       |                  |                                                                                                                                                                                                                            |                                       | Plastic                    | 345                                      |                |         |
|                                       |                  |                                                                                                                                                                                                                            |                                       | Pb                         | 1045                                     |                |         |
| USA: Surry (1972-1979)                | Li other filters | LIF TLD                                                                                                                                                                                                                    | Eberline TLD-100                      | Mylar                      | 10                                       |                |         |
|                                       |                  |                                                                                                                                                                                                                            |                                       | Mylar                      | 285                                      |                |         |
| USA: Surry (1980-1989)                | Ca and mixed     | CaSO <sub>4</sub>                                                                                                                                                                                                          | Teledyne CaSO <sub>4</sub> PB-3       | Open window                | 7                                        |                |         |
|                                       |                  |                                                                                                                                                                                                                            |                                       | Teflon                     | 500                                      |                |         |
|                                       |                  |                                                                                                                                                                                                                            |                                       | Cu                         | 1000                                     |                |         |
|                                       |                  |                                                                                                                                                                                                                            |                                       | Cd                         | 1000                                     |                |         |
| USA: Surry (1990-1995)                | Ca and mixed     | <sup>n</sup> Li <sub>2</sub> <sup>n</sup> B <sub>4</sub> O <sub>7</sub><br><sup>n</sup> Li <sub>2</sub> <sup>n</sup> B <sub>4</sub> O <sub>7</sub><br>Ca <sub>2</sub> SO <sub>4</sub><br>Ca <sub>2</sub> SO <sub>4</sub>   | Panasonic UD-802 model 879 holder     | Mylar                      | 17                                       |                | (56,57) |
|                                       |                  |                                                                                                                                                                                                                            |                                       | Plastic                    | 78                                       |                |         |
|                                       |                  |                                                                                                                                                                                                                            |                                       | Plastic                    | 310                                      |                |         |
|                                       |                  |                                                                                                                                                                                                                            |                                       | Pb                         | 990                                      |                |         |
| USA: Surry (1996-1999)                | Ca and mixed     | <sup>n</sup> Li <sub>2</sub> <sup>n</sup> B <sub>4</sub> O <sub>7</sub><br><sup>n</sup> Li <sub>2</sub> <sup>n</sup> B <sub>4</sub> O <sub>7</sub><br>Ca <sub>2</sub> SO <sub>4</sub><br>Ca <sub>2</sub> SO <sub>4</sub>   | Panasonic UD-802 model 874 holder     | Mylar                      | 17                                       |                | (56,57) |
|                                       |                  |                                                                                                                                                                                                                            |                                       | Plastic                    | 310                                      |                |         |
|                                       |                  |                                                                                                                                                                                                                            |                                       | Plastic                    | 310                                      |                |         |
|                                       |                  |                                                                                                                                                                                                                            |                                       | Pb                         | 990                                      |                |         |
| USA: Three Mile Island (1970-1975)    | Multi Cu-Pb      | Film                                                                                                                                                                                                                       | Landauer Film type G                  | Open window                |                                          |                |         |
|                                       |                  |                                                                                                                                                                                                                            |                                       | Plastic                    | 7                                        |                |         |
|                                       |                  |                                                                                                                                                                                                                            |                                       | Plastic                    | 160                                      |                |         |
|                                       |                  |                                                                                                                                                                                                                            |                                       | Plastic                    | 310                                      |                |         |
|                                       |                  |                                                                                                                                                                                                                            |                                       | Plastic + Al               | 340                                      |                |         |
|                                       |                  |                                                                                                                                                                                                                            |                                       | 60%Pb+40%Sn +alloy+plastic | 1630                                     |                |         |
| USA: Three Mile Island (1976-1983)    | Li Al filter     | Li based TLD                                                                                                                                                                                                               | Harshaw TLD-100                       |                            | 30                                       |                |         |
|                                       |                  |                                                                                                                                                                                                                            |                                       | Al                         | 280                                      |                |         |
| USA: Three Mile Island (1983-1999)    | Ca and mixed     | <sup>n</sup> Li <sub>2</sub> <sup>n</sup> B <sub>4</sub> O <sub>7</sub><br><sup>n</sup> Li <sub>2</sub> <sup>n</sup> B <sub>4</sub> O <sub>7</sub><br>Ca <sub>2</sub> SO <sub>4</sub><br>Ca <sub>2</sub> SO <sub>4</sub>   | Panasonic UD-802 ISA model 830        | Mylar                      | 14                                       |                | (56,57) |
|                                       |                  |                                                                                                                                                                                                                            |                                       | Plastic                    | 75                                       |                |         |
|                                       |                  |                                                                                                                                                                                                                            |                                       | Plastic                    | 350                                      |                |         |
|                                       |                  |                                                                                                                                                                                                                            |                                       | Pb                         | 1000                                     |                |         |
| USA: Turkey point Station (1972-1975) |                  | LIF TLD                                                                                                                                                                                                                    | Eberline                              | Mylar                      | 10                                       |                |         |
|                                       |                  |                                                                                                                                                                                                                            |                                       | Mylar / Plastic            | 285                                      |                |         |
|                                       |                  |                                                                                                                                                                                                                            |                                       | Mylar / Plastic            | 285                                      |                |         |
| USA: Turkey point Station (1976-1985) | Li Al filter     | Li based TLD                                                                                                                                                                                                               | Harshaw TLD-100                       |                            | 30                                       |                |         |
|                                       |                  |                                                                                                                                                                                                                            |                                       | Al                         | 280                                      |                |         |

Supplementary Information \_ Characteristics of dosimeters used for photon dose estimation

Supplementary Table S1 was completed by health physicists using the best available information; however, expert judgment was also necessary.

| Country: Facility (period)            | Dosimeter Type             | Dosimeter material                                                                                                                                                                                                         | Commercial type                       | Filters        | Density thickness (mg.cm <sup>-2</sup> ) | Thickness (mm) | Ref     |
|---------------------------------------|----------------------------|----------------------------------------------------------------------------------------------------------------------------------------------------------------------------------------------------------------------------|---------------------------------------|----------------|------------------------------------------|----------------|---------|
| USA: Turkey point Station (1985-1991) | Li other filters           | LiF TLD                                                                                                                                                                                                                    | Harshaw 8805 system                   | Plastic/Cu     | 345                                      |                |         |
|                                       |                            |                                                                                                                                                                                                                            |                                       | Plastic/Teflon | 1000                                     |                |         |
|                                       |                            |                                                                                                                                                                                                                            |                                       | Mylar          | 17                                       |                |         |
|                                       |                            |                                                                                                                                                                                                                            |                                       | Plastic        | 312                                      |                |         |
| USA: Turkey point Station (1991-1999) | Ca and mixed               | <sup>7</sup> Li <sub>2</sub> <sup>11</sup> B <sub>4</sub> O <sub>7</sub><br><sup>7</sup> Li <sub>2</sub> <sup>11</sup> B <sub>4</sub> O <sub>7</sub><br>Ca <sub>2</sub> SO <sub>4</sub><br>Ca <sub>2</sub> SO <sub>4</sub> | Panasonic UD-802 ISA model 820 Holder | Mylar          | 19                                       |                | (56,57) |
|                                       |                            |                                                                                                                                                                                                                            |                                       | Plastic        | 345                                      |                |         |
|                                       |                            |                                                                                                                                                                                                                            |                                       | Plastic        | 345                                      |                |         |
|                                       |                            |                                                                                                                                                                                                                            |                                       | Pb             | 1045                                     |                |         |
| USA: West Valley (1965-1970)          | Missing info               | Film                                                                                                                                                                                                                       | Nuclear Chicago                       | Open window    |                                          |                |         |
|                                       |                            |                                                                                                                                                                                                                            |                                       | Al             |                                          |                |         |
|                                       |                            |                                                                                                                                                                                                                            |                                       | Cd             |                                          |                |         |
|                                       |                            |                                                                                                                                                                                                                            |                                       | Pb             |                                          |                |         |
| USA: West Valley (1970-1982)          | Multi element              | Film                                                                                                                                                                                                                       | Dupont 552                            | Open window    |                                          |                |         |
|                                       |                            |                                                                                                                                                                                                                            |                                       | Plastic        | 350                                      |                |         |
|                                       |                            |                                                                                                                                                                                                                            |                                       | Al             | 540                                      |                |         |
|                                       |                            |                                                                                                                                                                                                                            |                                       | Pb/Tn          | 1660                                     |                |         |
| USA: West Valley (1982-1986)          | Li other filters           | Li based TLD                                                                                                                                                                                                               | Harshaw                               | Open window    |                                          |                |         |
|                                       |                            |                                                                                                                                                                                                                            |                                       | Plastic        | 300                                      |                |         |
|                                       |                            |                                                                                                                                                                                                                            |                                       | Plastic + Cu   | 242                                      |                |         |
|                                       |                            |                                                                                                                                                                                                                            |                                       | Teflon         | 1000                                     |                |         |
| USA: West Valley (1986-2005)          | Li Al-plastic filter       | Li based TLD                                                                                                                                                                                                               | Panasonic 814AS4                      | Al/plastic     | 7+15+68+600                              |                | (56)    |
| USA: Zion (1972-1985)                 | Multi Cu-Pb                | Film                                                                                                                                                                                                                       | Landauer Film type G                  | Open window    |                                          |                |         |
|                                       |                            |                                                                                                                                                                                                                            |                                       | Plastic        | 7                                        |                |         |
|                                       |                            |                                                                                                                                                                                                                            |                                       | Plastic        | 160                                      |                |         |
|                                       |                            |                                                                                                                                                                                                                            |                                       | Plastic        | 310                                      |                |         |
|                                       |                            |                                                                                                                                                                                                                            |                                       | Plastic + Al   | 340                                      |                |         |
|                                       | 60%Pb+40%Sn +alloy+plastic | 1630                                                                                                                                                                                                                       |                                       |                |                                          |                |         |
| USA: Zion (1985-1999)                 | Ca and mixed               | <sup>n</sup> Li <sub>2</sub> <sup>n</sup> B <sub>4</sub> O <sub>7</sub><br><sup>n</sup> Li <sub>2</sub> <sup>n</sup> B <sub>4</sub> O <sub>7</sub><br>Ca <sub>2</sub> SO <sub>4</sub><br>Ca <sub>2</sub> SO <sub>4</sub>   | Panasonic UD-802                      | Mylar          | 28                                       |                | (56,57) |
|                                       |                            |                                                                                                                                                                                                                            |                                       | Plastic        | 310                                      |                |         |
|                                       |                            |                                                                                                                                                                                                                            |                                       | Plastic        | 310                                      |                |         |
|                                       |                            |                                                                                                                                                                                                                            |                                       | Pb             | 960                                      |                |         |

Supplementary Information \_ Characteristics of dosimeters used for photon dose estimation  
**Supplementary Table S1 was completed by health physicists using the best available information; however, expert judgment was also necessary.**

## References

32. Bermann F, Chanourdie JC. Reconnaissance assistée des rayonnements à partir des données d'un dosimètre photographique. Radioprotection 1973; 8:189-205.
33. Bermann F. La dosimétrie individuelle au laboratoire d'exploitation dosimétrique de Fontenay-aux-Roses. Report CEA/IPSN/LED. Fontenay-aux-Roses: Commissariat à l'Energie Atomique; 1987.
34. Ribault S, Chemtob M. Dosimètre photographique PS-1. Report CTHIR 97-118. Fontenay-aux-Roses: Institut de Protection et Sûreté Nucléaire; 1997.
35. Ribault S, Chemtob M. Dosimètre photographique PS-1. Report CTHIR 97-118c. Fontenay-aux-Roses: Institut de Protection et Sûreté Nucléaire; 1997.
36. Ribault S, Ginistry C, Chemtob M. Dosimètre photographique PS-1. Report Procès verbal CTHIR 97-119. Fontenay-aux-Roses: Institut de Protection et Sûreté Nucléaire; 1997.
37. Soudain G. Aspects Théoriques et Techniques de la Dosimétrie Photographique. Industries Atomiques 1965; 5/6/7/8:1-18.
38. Soudain G. Le dosimètre photographique. Sécurité et médecine du travail 1972; 21-7.
39. AREVA NC. Caractéristiques techniques des détecteurs et des dosimètres du SPR/DMR. Report REC MAR 05146028 R1. 2008.
40. Coudert M. Précision des dosimètres - intercomparaison film-dosimètre électronique. Report D584-SRE/TM-90. Saint-Denis: Electricité de France; 1990.

Supplementary Information \_ Characteristics of dosimeters used for photon dose estimation  
**Supplementary Table S1 was completed by health physicists using the best available information; however, expert judgment was also necessary.**

41. Le Roy G. Dosimètre photographique type 7. Report LCIE.SPE-TEC-001. Fontenay-aux-Roses: Laboratoire Central des Industries Electriques; 2004.
42. Heard MJ, Cook JE, Holt PD. Photographic Emulsion Dosimetry and the AERE Film Dosimeter. AERE Report R3300. London: Her Majesty's Stationary Office; 1960.
43. Adams N, Heard MJ, Holt PD. Film Dosimetry Practice with the AERE/RPS Film Holder: A collection of Experimental Data. Report AERE-R4669. London: Her Majesty's Stationary Office; 1965.
44. Burt AK, Smith JW. Film dosimetry with the AERE/RPS film holder. A reassessment using the "Estar" film. AERE Report R-6156. London: Her Majesty's Stationary Office; 1972.
45. Hall EJ. Physics of X-Rays absorption. Radiobiology for the radiologist. New York: Harper&Row; 1978.
46. Heard MJ, Jones BE. A New Film Holder for Personnel Dosimetry. In Symposium on Personnel Dosimetry Techniques for External Radiation and their Application in Nuclear Establishments; Madrid: ENEA; 1963.
47. Iles WJ, Milton MIL, Bartlett DT, Burgess PH, Hill CE. Type testing of the NRPB/AERE film badge dosimeter in terms of the new ICRU secondary quantities. Part 1: Photons over the energy range 10 keV-1250 keV. Report NRPB-R236. London: National Radiological Protection Board; 1990.
48. Iles WJ, Milton MIL, . Type testing of the NRPB/AERE film badge dosimeter in terms of the new ICRU secondary quantities. Part 2: Photons over the energy range 4 MeV- 7MeV. Report NRPB-R257. London: National Radiological Protection Board; 1992.

Supplementary Information \_ Characteristics of dosimeters used for photon dose estimation  
**Supplementary Table S1 was completed by health physicists using the best available information; however, expert judgment was also necessary.**

49. Langmead WA, Adams N. Investigations of the accuracy attained in routine film badge dosimetry. *Health Phys* 1967; 13(2):167-80.
50. Marshall TO, Iles WJ, Overend JK, Twyman A. An evaluation of the Eastman Kodak Type 2 film. Report NRPB R-103. London: National Radiological Protection Board; 1980.
51. Report on the performance of the automated Alnor TLD system comprising TLD reader and TLD irradiator. Roskilde: Riso National Laboratory; 1987.
52. Bartlett DT, Burgess PH, Francis TM, Dutt JC, Dimbylow PJ. The Energy and Angle Dependence of the Response to photons of the NRPB Thermoluminescence Dosimeter in terms of the New ICRU Quantities. *Radiat Prot Dosimetry* 1986; 17:29-31.
53. Perry KEG, Preston HE. Progress towards thermoluminescent dosimetry system for large-scale routine personnel monitoring. In Second international congress of the international radiation protection association; Brighton: International Radiation Protection Association; 1970.
54. Shaw KB, Wall BF. Performance Tests on the NRPB Thermoluminescent Dosimeter. Report NRPB-R65. London: Her Majesty's Stationary Office; 1977.
55. Dealler JFB, Jones BE, Smith EE. Personnel monitoring for external radiation: a national service. *Occup Saf Health* 1958; Jul-Sept:137-53.
56. TL badge - Technical Data. Report E-BDG/TD-2. Osaka : Matsushita Electric Industrial Co.; 1985.
57. Westinghouse Savannah River compagny. External angular dependance external dosimetry. Report Technical basis manual WSRC-IM-92101. Aiken: Department of Energy; 1993.

Supplementary Information \_ Characteristics of dosimeters used for photon dose estimation  
**Supplementary Table S1 was completed by health physicists using the best available information; however, expert judgment was also necessary.**

58. Fix JJ, Gilbert ES, Baumgartner WV. An assessment of bias and uncertainty in recorded dose from external sources of radiation for workers at the Hanford site. Report PNL-10066. Richland, WA: National Research Council; 1994.
59. Wilson RH. Historical Review of Personnel Dosimetry Development and its Use in Radiation Protection Programs at Hanford. Report PNL-6125. Richland, WA: Pacific Northwest Laboratory; 1987.
60. Wilson RH, Fix JJ, Baumgartner WV, Nichols LL. Description and evaluation of the Hanford personal dosimeter program from 1944 through 1989. Report PNL-7447. Richland, WA: Pacific Northwest Laboratory; 1990.
61. Ahmed AB, McMahan KL, Colwell DS. Angular response characterization of the Martin Marietta energy systems. Report ORNL-TM-1202. Oak Ridge, Tennessee: Oak ridge National Laboratory; 1993.
